# Supplementary material
Source: PubMed Central journal article supplement (PMC5744684)
Supplement: NIHMS926759-supplement-Supplement_Supplement_1.pdf [file NIHMS926759-supplement-Supplement_Supplement_1.pdf]

## Supporting Information

### An Interlaboratory Evaluation of Drift Tube Ion Mobility - Mass Spectrometry Collision Cross Section Measurements

Sarah M. Stow<sup>1</sup>, Tim J. Causon<sup>2</sup>, Xueyun Zheng<sup>3</sup>, Ruwan T. Kurulugama<sup>4</sup>, Teresa Mairinger<sup>2</sup>, Jody C. May<sup>1</sup>, Emma E. Rennie<sup>4</sup>, Erin S. Baker<sup>3</sup>, Richard D. Smith<sup>3</sup>, John A. McLean<sup>1</sup>, Stephan Hann<sup>2</sup> and John C. Fjeldsted<sup>4\*</sup>

<sup>1</sup>Department of Chemistry, Center for Innovative Technology, Vanderbilt Institute of Chemical Biology, Vanderbilt Institute for Integrative Biosystems Research and Education, Vanderbilt University, Nashville, TN 37235, United States

<sup>2</sup>Division of Analytical Chemistry, Department of Chemistry, University of Natural Resources and Life Sciences (BOKU, Vienna), Vienna 1190, Austria

<sup>3</sup>Biological Sciences Division, Pacific Northwest National Laboratory, Richland, WA 99352, United States

<sup>4</sup>Agilent Technologies, Santa Clara, California 95051, United States

\*Corresponding Author: Agilent Technologies, Santa Clara, CA 95051  
Email: john\_fjeldsted@agilent.com

#### Abstract

Collision cross section (CCS) measurements resulting from ion mobility – mass spectrometry (IM-MS) experiments provide a promising orthogonal dimension of structural information in MS based analytical separations. As with any molecular identifier, interlaboratory standardization must precede broad range integration into analytical workflows. In this study we present a reference drift tube ion mobility mass spectrometer (DTIM-MS) where improvements on the measurement accuracy of experimental parameters influencing IM separations provide standardized drift tube, nitrogen CCS values (<sup>DT</sup>CCS<sub>N<sub>2</sub></sub>) for over 120 unique ion species with the lowest measurement uncertainty to date. The reproducibility of these <sup>DT</sup>CCS<sub>N<sub>2</sub></sub> values are evaluated across three additional laboratories on a commercially-available DTIM-MS instrument. The traditional stepped field CCS method performs with a relative standard deviation (RSD) of 0.29% for all ion species across the three additional laboratories. The calibrated single field CCS method, which is compatible with a wide range of chromatographic inlet systems, performs with an average, absolute bias of 0.54% to the standardized stepped field <sup>DT</sup>CCS<sub>N<sub>2</sub></sub> values on the reference system. The low RSD and biases observed in this interlaboratory study illustrate the potential of DTIM-MS for providing a molecular identifier for a broad range of discovery based analyses.

## **Table of Contents**

|                                                     |             |
|-----------------------------------------------------|-------------|
| Sample Information and Detailed Instrument Settings | Pages 3-5   |
| Correction approach for Instrument Improvements     | Pages 6-9   |
| Detailed Tune Mix CCS Values                        | Pages 10-13 |
| Detailed Biological Standards Stepped Field Results | Pages 14-19 |
| Detailed Biological Standards Single Field Results  | Pages 20-28 |
| Detailed Theoretical Modeling Results               | Pages 29-45 |

## **Interlaboratory Study Stepped field Agilent Reference Method DB.xlsx**

This excel data file contains  $m/z$ , CCS, and other descriptors of the biological standards analyzed in this study in a database format.

**Table S1.** Chemical standards information for lipids and metabolites.

| Compound               | Sigma-Aldrich p/n | Agilent p/n           |
|------------------------|-------------------|-----------------------|
| <b>Lipids</b>          |                   |                       |
| C12:0                  | 61609-5G          |                       |
| C15:0                  | 91446-5G          |                       |
| C16:1                  | 76169-1G          |                       |
| C16:0                  | 76119-5G          |                       |
| C17:0                  | H3500-1G          |                       |
| C18:3                  | L2376-500MG       |                       |
| C18:2                  | L1376-500MG       |                       |
| C18:1                  | O1008-1G          |                       |
| C18:0                  | 85679-500MG       |                       |
| C20:4                  | A3611-100MG       |                       |
| C20:3                  | E4504-10MG        |                       |
| C20:2                  | E3127-25MG        |                       |
| C20:1                  | 44878-100MG       |                       |
| C20:0                  | A3631-500MG       |                       |
| C24:0                  | L6641-100MG       |                       |
| <b>Metabolites</b>     |                   |                       |
| Creatinine             | C4255-10G         |                       |
| L-proline              |                   | AA Standard 5061-3330 |
| L-leucine              |                   | AA Standard 5061-3330 |
| L-isoleucine           |                   | AA Standard 5061-3330 |
| L-aspartic acid        |                   | AA Standard 5061-3330 |
| Homocysteine           | 44925-25MG        |                       |
| L-glutamic acid        |                   | AA Standard 5061-3330 |
| L-lysine               |                   | AA Standard 5061-3330 |
| L-methionine           |                   | AA Standard 5061-3330 |
| L-histidine            |                   | AA Standard 5061-3330 |
| L-phenylalanine        |                   | AA Standard 5061-3330 |
| Uric acid              | U0881-10G         |                       |
| L-arginine             |                   | AA Standard 5061-3330 |
| L-tyrosine             |                   | AA Standard 5061-3330 |
| Glucose                | G8270-100G        |                       |
| L-cystine              |                   | AA Standard 5061-3330 |
| Pyridoxal 5'-phosphate | P9255-1G          |                       |
| Cortisol               | H4001-1G          |                       |
| Levomefolic acid       | M0132-5MG         |                       |
| <b>Peptides</b>        |                   |                       |
| Angiotensin I          | A9650-1MG         |                       |
| Angiotensin II         | A9525-1MG         |                       |
| Bradykinin             | B3259-1MG         |                       |
| Renin                  | R8129-1MG         |                       |
| Substance P            | S6883-1MG         |                       |
| Neurotensin            | N6383-1MG         |                       |
| Melittin               | M2272-1MG         |                       |

| Tune Mix Ions                                           |  |             |
|---------------------------------------------------------|--|-------------|
| Betaine                                                 |  | G1969-85000 |
| Trifluoroacetic acid ammonium salt                      |  | G1969-85000 |
| Hexamethoxyphosphazine                                  |  | G1969-85000 |
| Hexakis(1H, 1H, 3H-tetrafluoropropoxy) phosphazine      |  | G1969-85000 |
| Hexakis(1H, 1H, 5H-octafluoropentoxy) phosphazine       |  | G1969-85000 |
| Hexakis(1H, 1H, 7H-dodecafluoroheptoxy) phosphazine     |  | G1969-85000 |
| Hexakis(1H, 1H, 9H-perfluorononyloxy) phosphazine       |  | G1969-85000 |
| Hexakis(1H, 1H, 4H-hexafluorobutyloxy) phosphazine      |  | G1969-85000 |
| Hexakis(1H, 1H, 6H-decafluorohexyloxy) phosphazine      |  | G1969-85000 |
| Hexakis(1H, 1H, 8H-tetradecafluorooctyloxy) phosphazine |  | G1969-85000 |
| Tris(trifluoromethyl)-1,3,5-triazine                    |  | G1969-85000 |
| Tris(heptafluoropropyl)-1,3,5-triazine                  |  | G1969-85000 |

**Table S2.** Chemical Standards Information for peptides and proteins

| Compound                                 | Sigma-Aldrich p/n | Agilent p/n |
|------------------------------------------|-------------------|-------------|
| <b>Proteins</b>                          |                   |             |
| Ubiquitin                                | U6253-5MG         |             |
| Cytochrome c                             | C2506-50MG        |             |
| <b>Digest Peptides from Cytochrome c</b> |                   |             |
| GITWK                                    |                   |             |
| IFVQK                                    |                   |             |
| YIPGTK                                   |                   |             |
| MIFAGIK                                  |                   |             |
| EDLIAYLK                                 |                   |             |
| TGPNLHGLFGR                              |                   |             |
| TGQAPGFTYTDANK                           |                   |             |
| EETLMEYLENPK                             |                   |             |

**Table S3. Drift Tube Settings for Stepped Field Experiments**

| Time Sequence | Time (min) | Drift Tube Entrance (V) | Drift Tube Exit (V) | Rear Funnel Entrance (V) | Rear Funnel Exit (V) |
|---------------|------------|-------------------------|---------------------|--------------------------|----------------------|
| 1             | 0.0 – 0.5  | 1074                    | 224                 | 217.5                    | 45                   |
| 2             | 0.5 – 1.0  | 1174                    | 224                 | 217.5                    | 45                   |
| 3             | 1.0 – 1.5  | 1274                    | 224                 | 217.5                    | 45                   |
| 4             | 1.5 – 2.0  | 1374                    | 224                 | 217.5                    | 45                   |
| 5             | 2.0 – 2.5  | 1474                    | 224                 | 217.5                    | 45                   |
| 6             | 2.5 – 3.0  | 1574                    | 224                 | 217.5                    | 45                   |
| 7             | 3.0 – 3.5  | 1674                    | 224                 | 217.5                    | 45                   |

**Table S4. Drift Tube Settings for Stepped Field Experiments – Fragile Ion Tune**

| Time Sequence | Time (min) | Drift Tube Entrance (V) | Drift Tube Exit (V) | Rear Funnel Entrance (V) | Rear Funnel Exit (V) |
|---------------|------------|-------------------------|---------------------|--------------------------|----------------------|
| 1             | 0.0 – 0.5  | 1067                    | 217                 | 210.5                    | 38                   |
| 2             | 0.5 – 1.0  | 1167                    | 217                 | 210.5                    | 38                   |
| 3             | 1.0 – 1.5  | 1267                    | 217                 | 210.5                    | 38                   |
| 4             | 1.5 – 2.0  | 1367                    | 217                 | 210.5                    | 38                   |
| 5             | 2.0 – 2.5  | 1467                    | 217                 | 210.5                    | 38                   |
| 6             | 2.5 – 3.0  | 1567                    | 217                 | 210.5                    | 38                   |
| 7             | 3.0 – 3.5  | 1667                    | 217                 | 210.5                    | 38                   |

**Table S5. Drift Tube Settings for Single Field Experiments**

| Time Sequence | Time (min) | Drift Tube Entrance (V) | Drift Tube Exit (V) | Rear Funnel Entrance (V) | Rear Funnel Exit (V) |
|---------------|------------|-------------------------|---------------------|--------------------------|----------------------|
| 1             | 0.0 – 0.5  | 1574                    | 224                 | 217.5                    | 45                   |

### Single Field Experiment

The tune mix CCS values obtained in this study on the Reference System are used for the single field experiments as they represent the lowest measurement uncertainty to date due to thorough error analysis of the experimental parameters that influence CCS measurements. In a single field experiment, the calibrant tune mix ions are first run in a single field experiment and their drift times are measured and aligned with the stepped field CCS values mentioned above. The slope ( $\beta$ ) and intercept ( $t_{fix}$ ) (mentioned in the manuscript for Eqn (3)) are determined from the regression of these measured drift times and standard CCS values. The sample is then run at the exact same single field settings as the tune ions and according to Eqn 3 the drift times of the analytes present are converted into CCS values.

**Table S6.** Correcting CCS Data for Instrument Improvements on Agilent Reference System

|                     | <i>This is a 0.5% factor</i>  | <i>This is a 0.2% factor</i> | <i>This is 0.2% factor</i>          |                          |
|---------------------|-------------------------------|------------------------------|-------------------------------------|--------------------------|
| <b>Original CCS</b> | <b>Update Measured Length</b> | <b>Apply Voltage Slope</b>   | <b>Apply Temperature Correction</b> | <b>New Agilent Value</b> |
|                     | $= (78.12/78.302)^2$          |                              |                                     |                          |
|                     | 0.9954                        | 1.00284 (+)<br>1.0013 (-)    | 1.0019                              |                          |
| 622 Example         |                               |                              |                                     |                          |
| 203.20              | 202.26                        | 202.83                       | 203.22                              | 203.22                   |
| 1633 Example        |                               |                              |                                     |                          |
| 320.60              | 319.11                        | 319.53                       | 320.13                              | 320.13                   |

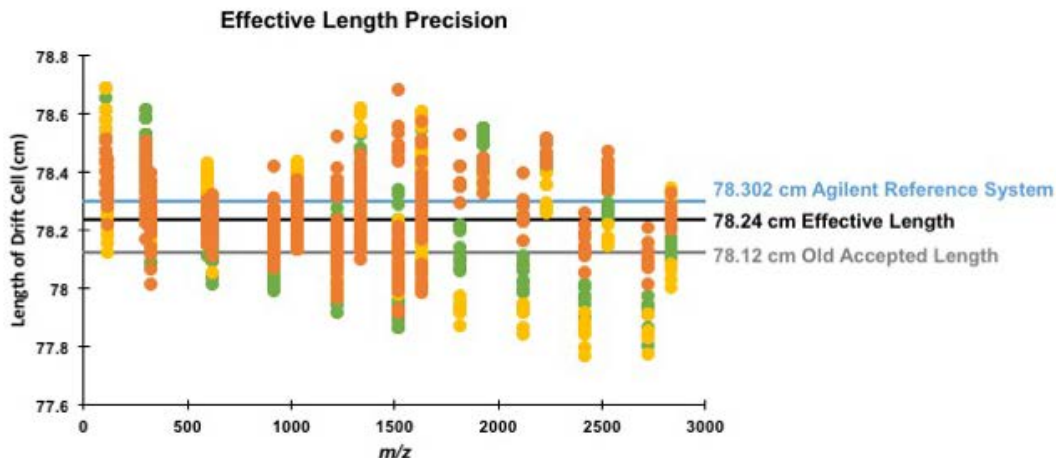

**Figure S1.** To account for the instrument updates on the Agilent Reference System as well as end effects due to front and rear funnels on both ends of the drift cell an effective length was determined for the other three labs in this study (BOKU, green; PNNL, orange; and Vanderbilt, yellow). An effective length was determined for each tune mix CCS measurement obtained on each of the three instruments, on three different days, and at four different tune settings. This resulted in 1,413 effective lengths which average to  $78.24 \pm 0.16$  cm. This precision across the three different labs, different tune settings, and over the mass range gives us confidence in using 78.24 cm as the new drift tube length. The metrology measured drift cell length for the gridded Agilent Reference System is also noted as 78.302 cm and the previously accepted production length of 78.12 cm is shown for reference.



**Table S7.** Converting CCS Values with Effective Length

|                                     |                                                                       |                                        |                                                           |                                |
|-------------------------------------|-----------------------------------------------------------------------|----------------------------------------|-----------------------------------------------------------|--------------------------------|
|                                     | <i>This is the 3 day, 4 tune settings Agilent CCS Reference Value</i> |                                        | <i>This is the consensus Effective Length of 78.24 cm</i> |                                |
| <b>Original CCS (Å<sup>2</sup>)</b> | <b>Compare to Agilent Reference System Value</b>                      | <b>Determine Effective Length (cm)</b> | <b>Use Effective Length to Obtain New CCS</b>             | <b>New CCS (Å<sup>2</sup>)</b> |
| 622<br>Example                      |                                                                       |                                        |                                                           |                                |
| 203.30                              | $\sqrt{(203.30/202.96)} = 1.000849$                                   | 1.000849 *<br>78.12 = 78.19            | 203.3 * (78.12/78.24) <sup>2</sup>                        | 202.69                         |
| 1633<br>Example                     |                                                                       |                                        |                                                           |                                |
| 321.30                              | $\sqrt{(321.30/319.03)} = 1.003552$                                   | 1.003552 *<br>78.12 = 78.40            | 321.30 *<br>(78.12/78.24) <sup>2</sup>                    | 320.35                         |

**Table S8. Average CCS Values from BOKU, PNNL and VU for Tune Mix Ions**

| <b>Tune Mix Ions – Positive Mode</b> |                        |                              |     |        |
|--------------------------------------|------------------------|------------------------------|-----|--------|
| <i>m/z</i>                           | CCS ( $\text{\AA}^2$ ) | %RSD<br>( <i>interlab.</i> ) | n   | Bias   |
| 118                                  | 121.51 ± 0.21          | 0.17%                        | 81  | 0.17%  |
| 322                                  | 153.67 ± 0.20          | 0.13%                        | 108 | -0.04% |
| 622                                  | 202.67 ± 0.24          | 0.12%                        | 108 | -0.14% |
| 922                                  | 243.05 ± 0.34          | 0.14%                        | 108 | -0.24% |
| 1222                                 | 281.25 ± 0.55          | 0.20%                        | 108 | -0.34% |
| 1522                                 | 315.79 ± 0.81          | 0.26%                        | 99  | -0.37% |
| 1822                                 | 350.43 ± 1.76          | 0.50%                        | 27  | -0.23% |
| 2122                                 | 381.40 ± 1.54          | 0.40%                        | 27  | -0.43% |
| 2422                                 | 410.28 ± 1.49          | 0.36%                        | 27  | -0.65% |
| 2722                                 | 437.94 ± 1.39          | 0.32%                        | 27  | -0.74% |
| <b>Tune Mix Ions – Negative Mode</b> |                        |                              |     |        |
| <i>m/z</i>                           | CCS ( $\text{\AA}^2$ ) | %RSD<br>( <i>interlab.</i> ) | n   | Bias   |
| 113                                  | 108.93 ± 0.25          | 0.23%                        | 45  | 0.65%  |
| 302                                  | 140.66 ± 0.32          | 0.23%                        | 108 | 0.44%  |
| 602                                  | 180.94 ± 0.31          | 0.17%                        | 108 | 0.09%  |
| 1034                                 | 255.59 ± 0.53          | 0.21%                        | 108 | 0.10%  |
| 1334                                 | 285.29 ± 0.78          | 0.27%                        | 108 | 0.19%  |
| 1634                                 | 319.53 ± 1.34          | 0.42%                        | 108 | 0.16%  |
| 1934                                 | 354.32 ± 0.64          | 0.18%                        | 27  | 0.50%  |
| 2234                                 | 382.39 ± 0.79          | 0.21%                        | 27  | 0.43%  |
| 2534                                 | 413.67 ± 1.03          | 0.25%                        | 27  | 0.16%  |
| 2834                                 | 431.98 ± 1.12          | 0.26%                        | 27  | -0.15% |

**Table S9. Positive Mode Tune Mix Values ( $\text{\AA}^2$ )**

| Lab                | Collision Cross Section Data |               |               |               |                          |
|--------------------|------------------------------|---------------|---------------|---------------|--------------------------|
|                    | 250 Fragile                  | 250 Stable    | 1700          | 3200          | Summary                  |
| 118 Tune Mix Ion   |                              |               |               |               |                          |
| Agilent            | 121.41 ± 0.22                | 121.37 ± 0.14 | 121.13 ± 0.22 |               | 121.30 ± 0.20<br>(0.17%) |
| BOKU               | 121.57 ± 0.17                | 121.56 ± 0.17 | 121.69 ± 0.17 |               | 121.51 ± 0.21<br>(0.17%) |
| PNNL               | 121.69 ± 0.12                | 121.53 ± 0.14 | 121.60 ± 0.09 |               |                          |
| VU                 | 121.27 ± 0.25                | 121.36 ± 0.12 | 121.33 ± 0.09 |               |                          |
| 322 Tune Mix Ion   |                              |               |               |               |                          |
| Agilent            | 153.79 ± 0.22                | 153.71 ± 0.13 | 153.52 ± 0.21 | 153.89 ± 0.22 | 153.73 ± 0.23<br>(0.15%) |
| BOKU               | 153.80 ± 0.19                | 153.76 ± 0.16 | 153.66 ± 0.13 | 153.43 ± 0.19 | 153.67 ± 0.20<br>(0.13%) |
| PNNL               | 154.02 ± 0.21                | 153.80 ± 0.14 | 153.71 ± 0.17 | 153.43 ± 0.36 |                          |
| VU                 | 153.52 ± 0.13                | 153.72 ± 0.08 | 153.57 ± 0.13 | 153.60 ± 0.22 |                          |
| 622 Tune Mix Ions  |                              |               |               |               |                          |
| Agilent            | 203.06 ± 0.18                | 203.66 ± 0.22 | 202.77 ± 0.25 | 202.93 ± 0.35 | 202.96 ± 0.27<br>(0.14%) |
| BOKU               | 202.61 ± 0.22                | 202.56 ± 0.23 | 202.53 ± 0.23 | 202.27 ± 0.26 | 202.67 ± 0.24<br>(0.12%) |
| PNNL               | 202.94 ± 0.24                | 202.87 ± 0.19 | 202.69 ± 0.14 | 202.68 ± 0.33 |                          |
| VU                 | 202.52 ± 0.20                | 202.87 ± 0.13 | 202.83 ± 0.14 | 202.70 ± 0.16 |                          |
| 922 Tune Mix Ions  |                              |               |               |               |                          |
| Agilent            | 243.71 ± 0.19                | 243.70 ± 0.20 | 243.48 ± 0.28 | 243.68 ± 0.45 | 243.64 ± 0.30<br>(0.12%) |
| BOKU               | 242.67 ± 0.38                | 242.66 ± 0.29 | 242.69 ± 0.33 | 243.06 ± 0.31 | 243.05 ± 0.34<br>(0.14%) |
| PNNL               | 243.09 ± 0.37                | 243.21 ± 0.21 | 243.29 ± 0.19 | 243.89 ± 0.39 |                          |
| VU                 | 242.81 ± 0.15                | 243.14 ± 0.20 | 243.06 ± 0.12 | 243.01 ± 0.17 |                          |
| 1221 Tune Mix Ions |                              |               |               |               |                          |
| Agilent            | 282.29 ± 0.20                | 282.14 ± 0.32 | 281.87 ± 0.29 | 282.49 ± 0.71 | 282.20 ± 0.47<br>(0.17%) |
| BOKU               | 280.45 ± 0.31                | 280.46 ± 0.32 | 280.47 ± 0.40 | 281.86 ± 0.38 | 281.25 ± 0.55<br>(0.20%) |
| PNNL               | 280.88 ± 0.41                | 281.34 ± 0.24 | 281.88 ± 0.20 | 283.16 ± 0.47 |                          |
| VU                 | 280.95 ± 0.44                | 281.14 ± 0.34 | 281.18 ± 0.15 | 281.21 ± 0.23 |                          |
| 1521 Tune Mix Ions |                              |               |               |               |                          |
| Agilent            | 316.96 ± 0.21                | 316.75 ± 0.37 | 316.53 ± 0.32 | 317.63 ± 0.73 | 316.96 ± 0.60<br>(0.19%) |
| BOKU               | 314.31 ± 0.31                | 314.51 ± 0.40 | 314.58 ± 0.51 | 317.01 ± 0.49 | 315.79 ± 0.81<br>(0.26%) |
| PNNL               | 315.09 ± 0.52                | 315.55 ± 0.26 | 316.47 ± 0.20 | 319.17 ± 0.61 |                          |
| VU                 |                              | 315.94 ± 0.63 | 315.42 ± 0.24 | 315.62 ± 0.17 |                          |
| 1821 Tune Mix Ions |                              |               |               |               |                          |
| Agilent            |                              |               |               | 351.25 ± 0.62 | 351.25 ± 0.62<br>(0.18%) |
| BOKU               |                              |               |               | 350.27 ± 0.56 | 350.43 ± 1.76<br>(0.50%) |
| PNNL               |                              |               |               | 352.53 ± 0.60 |                          |
| VU                 |                              |               |               | 348.48 ± 0.24 |                          |

| 2121 Tune Mix Ion |  |  |  |               |                          |
|-------------------|--|--|--|---------------|--------------------------|
| Agilent           |  |  |  | 383.03 ± 0.64 | 383.03 ± 0.64<br>(0.17%) |
| BOKU              |  |  |  | 381.03 ± 0.54 | 381.40 ± 1.54<br>(0.40%) |
| PNNL              |  |  |  | 383.30 ± 0.63 |                          |
| VU                |  |  |  | 379.86 ± 0.35 |                          |
| 2421 Tune Mix Ion |  |  |  |               |                          |
| Agilent           |  |  |  | 412.96 ± 0.58 | 412.96 ± 0.58<br>(0.14%) |
| BOKU              |  |  |  | 409.90 ± 0.55 | 410.28 ± 1.49<br>(0.36%) |
| PNNL              |  |  |  | 412.10 ± 0.66 |                          |
| VU                |  |  |  | 408.84 ± 0.47 |                          |
| 2721 Tune Mix Ion |  |  |  |               |                          |
| Agilent           |  |  |  | 441.21 ± 0.59 | 441.21 ± 0.59<br>(0.13%) |
| BOKU              |  |  |  | 437.29 ± 0.64 | 437.94 ± 1.39<br>(0.32%) |
| PNNL              |  |  |  | 439.69 ± 0.64 |                          |
| VU                |  |  |  | 436.84 ± 0.46 |                          |

**Table S10. Negative Tune Mix CCS Values ( $\text{\AA}^2$ )**

| Lab                | Collision Cross Section Data |               |               |               |                          |
|--------------------|------------------------------|---------------|---------------|---------------|--------------------------|
|                    | 250 Fragile                  | 250 Stable    | 1700          | 3200          | Summary                  |
| 112 Tune Mix Ion   |                              |               |               |               |                          |
| Agilent            | 108.23 ± 0.20                |               |               |               | 108.23 ± 0.20<br>(0.19%) |
| BOKU               | 109.15 ± 0.19                |               |               |               | 108.93 ± 0.25<br>(0.23%) |
| PNNL               | 108.80 ± 0.16                | 108.80 ± 0.19 |               |               |                          |
| VU                 | 108.92 ± 0.33                | 108.98 ± 0.22 |               |               |                          |
| 301 Tune Mix Ion   |                              |               |               |               |                          |
| Agilent            | 140.37 ± 0.18                | 140.15 ± 0.07 | 139.93 ± 0.15 | 139.70 ± 0.18 | 140.04 ± 0.29<br>(0.21%) |
| BOKU               | 141.09 ± 0.18                | 140.95 ± 0.29 | 140.86 ± 0.13 | 140.57 ± 0.14 | 140.66 ± 0.32<br>(0.23%) |
| PNNL               | 140.77 ± 0.09                | 140.77 ± 0.12 | 140.55 ± 0.10 | 140.10 ± 0.16 |                          |
| VU                 | 140.74 ± 0.10                | 140.74 ± 0.05 | 140.61 ± 0.15 | 140.12 ± 0.07 |                          |
| 601 Tune Mix Ions  |                              |               |               |               |                          |
| Agilent            | 180.83 ± 0.19                | 180.75 ± 0.11 | 180.60 ± 0.13 | 180.89 ± 0.29 | 180.77 ± 0.21<br>(0.12%) |
| BOKU               | 181.01 ± 0.27                | 180.96 ± 0.40 | 180.82 ± 0.25 | 180.73 ± 0.22 | 180.94 ± 0.31<br>(0.17%) |
| PNNL               | 180.79 ± 0.19                | 180.80 ± 0.10 | 180.55 ± 0.14 | 180.75 ± 0.14 |                          |
| VU                 | 181.23 ± 0.25                | 181.20 ± 0.14 | 181.20 ± 0.30 | 181.22 ± 0.07 |                          |
| 1033 Tune Mix Ions |                              |               |               |               |                          |
| Agilent            | 255.52 ± 0.25                | 255.59 ± 0.14 | 255.16 ± 0.21 | 255.09 ± 0.35 | 255.34 ± 0.32<br>(0.13%) |
| BOKU               | 255.58 ± 0.28                | 255.99 ± 0.34 | 255.83 ± 0.23 | 254.81 ± 0.16 | 255.59 ± 0.53<br>(0.21%) |
| PNNL               | 255.32 ± 0.20                | 256.00 ± 0.14 | 255.42 ± 0.23 | 254.94 ± 0.25 |                          |
| VU                 | 256.02 ± 0.28                | 256.06 ± 0.09 | 256.15 ± 0.47 | 254.99 ± 0.28 |                          |
| 1333 Tune Mix Ions |                              |               |               |               |                          |
| Agilent            | 284.49 ± 0.27                | 282.75 ± 0.18 | 285.03 ± 0.22 | 284.76 ± 0.31 | 284.76 ± 0.31<br>(0.11%) |
| BOKU               | 284.42 ± 0.24                | 285.59 ± 0.69 | 285.99 ± 0.46 | 285.17 ± 0.16 | 285.29 ± 0.78<br>(0.27%) |
| PNNL               | 284.16 ± 0.24                | 285.45 ± 0.19 | 285.85 ± 0.50 | 284.94 ± 0.27 |                          |
| VU                 | 284.93 ± 0.48                | 285.01 ± 0.21 | 286.46 ± 1.15 | 285.49 ± 0.16 |                          |
| 1633 Tune Mix Ions |                              |               |               |               |                          |
| Agilent            | 318.26 ± 0.34                | 319.55 ± 0.15 | 319.83 ± 0.26 | 319.48 ± 0.28 | 319.03 ± 0.70<br>(0.22%) |
| BOKU               | 317.73 ± 0.34                | 319.39 ± 1.22 | 320.30 ± 0.79 | 320.52 ± 0.17 | 319.53 ± 1.34<br>(0.42%) |
| PNNL               | 317.40 ± 0.26                | 318.90 ± 0.29 | 320.90 ± 0.70 | 319.79 ± 0.32 |                          |
| VU                 | 318.88 ± 1.00                | 318.87 ± 0.39 | 320.95 ± 1.28 | 320.76 ± 0.38 |                          |
| 1933 Tune Mix Ions |                              |               |               |               |                          |
| Agilent            |                              |               |               | 352.55 ± 0.27 | 352.55 ± 0.27<br>(0.08%) |
| BOKU               |                              |               |               | 355.10 ± 0.21 | 354.32 ± 0.64<br>(0.18%) |
| PNNL               |                              |               |               | 354.10 ± 0.37 |                          |
| VU                 |                              |               |               | 353.76 ± 0.23 |                          |

| 2233 Tune Mix Ion |  |  |  |               |                          |
|-------------------|--|--|--|---------------|--------------------------|
| Agilent           |  |  |  | 380.74 ± 0.31 | 380.74 ± 0.31<br>(0.08%) |
| BOKU              |  |  |  | 382.81 ± 0.26 | 382.39 ± 0.79<br>(0.21%) |
| PNNL              |  |  |  | 382.97 ± 0.30 |                          |
| VU                |  |  |  | 381.40 ± 0.47 |                          |
| 2533 Tune Mix Ion |  |  |  |               |                          |
| Agilent           |  |  |  | 412.99 ± 0.31 | 412.99 ± 0.31<br>(0.07%) |
| BOKU              |  |  |  | 413.30 ± 0.35 | 413.67 ± 1.03<br>(0.25%) |
| PNNL              |  |  |  | 414.67 ± 0.47 |                          |
| VU                |  |  |  | 413.03 ± 1.16 |                          |
| 2833 Tune Mix Ion |  |  |  |               |                          |
| Agilent           |  |  |  | 432.62 ± 0.35 | 432.62 ± 0.35<br>(0.08%) |
| BOKU              |  |  |  | 431.51 ± 0.44 | 431.98 ± 1.12<br>(0.26%) |
| PNNL              |  |  |  | 432.83 ± 0.46 |                          |
| VU                |  |  |  | 431.60 ± 1.56 |                          |

**Table S11. Stepped Field CCS Values for Biological Standards (Å<sup>2</sup>)**

| Compound           | m/z      | Ion                | BOKU             | PNNL             | VU               | Average          | % RSD     | Agilent          | % Error |
|--------------------|----------|--------------------|------------------|------------------|------------------|------------------|-----------|------------------|---------|
| <b>Lipids</b>      |          |                    |                  |                  |                  |                  |           |                  |         |
| C12:0              | 199.1704 | [M-H] <sup>-</sup> | 155.89<br>± 0.15 | 154.96<br>± 0.15 | 155.53<br>± 0.27 | 155.46<br>± 0.44 | 0.28<br>% | 154.82<br>± 0.10 | 0.41%   |
| C15:0              | 241.2173 | [M-H] <sup>-</sup> | 166.16<br>± 0.12 | 165.59<br>± 0.17 | 166.05<br>± 0.41 | 165.93<br>± 0.35 | 0.21<br>% | 165.34<br>± 0.06 | 0.36%   |
| C16:1              | 253.2173 | [M-H] <sup>-</sup> | 168.45<br>± 0.06 | 167.86<br>± 0.12 | 168.57<br>± 0.15 | 168.29<br>± 0.34 | 0.20<br>% | 167.95<br>± 0.06 | 0.20%   |
| C16:0              | 255.233  | [M-H] <sup>-</sup> | 169.78<br>± 0.00 | 169.17<br>± 0.06 | 169.57<br>± 0.25 | 169.51<br>± 0.30 | 0.18<br>% | 169.12<br>± 0.06 | 0.23%   |
| C17:0              | 269.2486 | [M-H] <sup>-</sup> | 174.13<br>± 0.21 | 173.49<br>± 0.12 | 174.06<br>± 0.41 | 173.90<br>± 0.38 | 0.22<br>% | 173.41<br>± 0.10 | 0.28%   |
| C18:3              | 277.2173 | [M-H] <sup>-</sup> | 175.06<br>± 0.00 | 174.53<br>± 0.10 | 174.63<br>± 0.17 | 174.74<br>± 0.26 | 0.15<br>% | 174.88<br>± 0.06 | 0.08%   |
| C18:2              | 279.233  | [M-H] <sup>-</sup> | 176.19<br>± 0.15 | 175.37<br>± 0.15 | 176.14<br>± 0.46 | 175.90<br>± 0.47 | 0.27<br>% | 175.69<br>± 0.06 | 0.12%   |
| C18:1              | 281.2486 | [M-H] <sup>-</sup> | 176.62<br>± 0.06 | 176.07<br>± 0.06 | 176.74<br>± 0.10 | 176.48<br>± 0.32 | 0.18<br>% | 176.46<br>± 0.15 | 0.01%   |
| C18:0              | 283.2643 | [M-H] <sup>-</sup> | 178.22<br>± 0.06 | 177.95<br>± 0.27 | 177.62<br>± 0.12 | 177.93<br>± 0.30 | 0.17<br>% | 177.66<br>± 0.06 | 0.15%   |
| C20:4              | 303.233  | [M-H] <sup>-</sup> | 183.30<br>± 0.15 | 182.21<br>± 0.06 | 182.91<br>± 0.51 | 182.81<br>± 0.55 | 0.30<br>% | 183.66<br>± 0.17 | 0.46%   |
| C20:3              | 305.2486 | [M-H] <sup>-</sup> | 183.20<br>± 0.06 | 182.64<br>± 0.21 | 182.21<br>± 0.45 | 182.68<br>± 0.50 | 0.27<br>% | 183.02<br>± 0.06 | 0.18%   |
| C20:2              | 307.2643 | [M-H] <sup>-</sup> | 183.44<br>± 0.10 | 182.38<br>± 0.17 | 183.01<br>± 0.12 | 182.94<br>± 0.48 | 0.26<br>% | 183.32<br>± 0.12 | 0.21%   |
| C20:1              | 309.2799 | [M-H] <sup>-</sup> | 185.23<br>± 0.17 | 183.95<br>± 0.21 | 184.79<br>± 0.52 | 184.66<br>± 0.64 | 0.34<br>% | 184.29<br>± 0.06 | 0.20%   |
| C20:0              | 311.2956 | [M-H] <sup>-</sup> | 186.56<br>± 0.06 | 186.36<br>± 0.23 | 186.20<br>± 0.36 | 186.37<br>± 0.27 | 0.14<br>% | 186.17<br>± 0.10 | 0.11%   |
| C24:0              | 367.3582 | [M-H] <sup>-</sup> | 202.15<br>± 0.06 | 200.57<br>± 0.10 | 201.04<br>± 0.35 | 201.25<br>± 0.72 | 0.36<br>% | 201.11<br>± 0.06 | 0.07%   |
| <b>Metabolites</b> |          |                    |                  |                  |                  |                  |           |                  |         |
| Creatinine         | 112.0516 | [M-H] <sup>-</sup> | 121.43<br>± 0.17 | 120.65<br>± 0.20 | 121.25<br>± 0.00 | 121.11<br>± 0.38 | 0.31<br>% | 120.70<br>± 0.15 | 0.34%   |
| Creatinine         | 114.0662 | [M+H] <sup>+</sup> | 124.35<br>± 0.06 | 123.93<br>± 0.21 | 123.83<br>± 0.06 | 124.04<br>± 0.26 | 0.21<br>% | 123.87<br>± 0.00 | 0.14%   |
| L-proline          | 116.0706 | [M+H] <sup>+</sup> | 126.38<br>± 0.27 | 126.48<br>± 0.27 | 125.87<br>± 0.36 | 126.24<br>± 0.38 | 0.30<br>% | 126.22<br>± 0.21 | 0.02%   |
| L-leucine          | 130.0874 | [M-H] <sup>-</sup> | 132.72<br>± 0.21 | 133.89<br>± 0.14 | 134.31<br>± 0.13 | 133.64<br>± 0.72 | 0.54<br>% | 132.51<br>± 0.01 | 0.85%   |
| L-isoleucine       | 130.0874 | [M-H] <sup>-</sup> | 131.58<br>± 0.19 | 132.62<br>± 0.10 | 132.84<br>± 0.18 | 132.34<br>± 0.60 | 0.45<br>% | 131.29<br>± 0.06 | 0.81%   |
| L-aspartic acid    | 132.0302 | [M-H] <sup>-</sup> | 120.95<br>± 0.00 | 120.71<br>± 0.50 | 120.51<br>± 0.15 | 120.72<br>± 0.32 | 0.27<br>% | 120.39<br>± 0.40 | 0.28%   |
| L-leucine          | 132.1019 | [M+H] <sup>+</sup> | 135.37<br>± 0.11 | 136.54<br>± 0.16 | 137.03<br>± 0.41 | 136.31<br>± 0.77 | 0.57<br>% | 135.56<br>± 0.07 | 0.56%   |
| L-isoleucine       | 132.1019 | [M+H] <sup>+</sup> | 133.71<br>± 0.09 | 134.80<br>± 0.19 | 135.06<br>± 0.38 | 134.52<br>± 0.66 | 0.49<br>% | 133.81<br>± 0.04 | 0.53%   |

| Compound            | m/z      | Ion                 | BOKU             | PNNL             | VU               | Average          | % RSD     | Agilent          | % Error |
|---------------------|----------|---------------------|------------------|------------------|------------------|------------------|-----------|------------------|---------|
| Homocysteine        | 136.0427 | [M+H] <sup>+</sup>  | 131.40<br>± 0.20 | 130.53<br>± 0.25 | 130.73<br>± 0.15 | 130.89<br>± 0.43 | 0.33<br>% | 130.78<br>± 0.06 | 0.08%   |
| Creatinine          | 136.0481 | [M+Na] <sup>+</sup> | 133.49<br>± 0.17 | 133.41<br>± 0.17 | 133.11<br>± 0.35 | 133.34<br>± 0.27 | 0.21<br>% | 132.99<br>± 0.35 | 0.26%   |
| L-glutamic acid     | 146.0459 | [M-H] <sup>-</sup>  | 126.01<br>± 0.06 | 125.64<br>± 0.12 | 125.87<br>± 0.10 | 125.84<br>± 0.18 | 0.14<br>% | 125.65<br>± 0.15 | 0.15%   |
| L-lysine            | 147.1128 | [M+H] <sup>+</sup>  | 132.01<br>± 0.20 | 131.80<br>± 0.35 | 131.40<br>± 0.10 | 131.74<br>± 0.34 | 0.26<br>% | 131.62<br>± 0.53 | 0.09%   |
| L-methionine        | 150.0583 | [M+H] <sup>+</sup>  | 133.88<br>± 0.38 | 133.65<br>± 0.78 | 133.61<br>± 0.10 | 133.71<br>± 0.46 | 0.34<br>% | 134.08<br>± 0.40 | 0.27%   |
| L-histidine         | 154.0622 | [M-H] <sup>-</sup>  | 130.50<br>± 0.00 | 130.13<br>± 0.06 | 130.33<br>± 0.12 | 130.32<br>± 0.17 | 0.13<br>% | 130.01<br>± 0.10 | 0.24%   |
| L-histidine         | 156.0768 | [M+H] <sup>+</sup>  | 132.71<br>± 0.10 | 132.41<br>± 0.10 | 132.31<br>± 0.10 | 132.47<br>± 0.20 | 0.15<br>% | 132.74<br>± 0.12 | 0.20%   |
| L-phenylalanine     | 164.0717 | [M-H] <sup>-</sup>  | 141.59<br>± 0.06 | 140.95<br>± 0.27 | 141.49<br>± 0.41 | 141.34<br>± 0.38 | 0.27<br>% | 141.29<br>± 0.20 | 0.04%   |
| L-phenylalanine     | 166.0863 | [M+H] <sup>+</sup>  | 141.59<br>± 0.32 | 141.02<br>± 0.21 | 141.26<br>± 0.10 | 141.29<br>± 0.32 | 0.23<br>% | 141.28<br>± 0.06 | 0.01%   |
| Uric acid           | 167.0211 | [M-H] <sup>-</sup>  | 127.71<br>± 0.10 | 127.08<br>± 0.00 | 127.41<br>± 0.06 | 127.40<br>± 0.28 | 0.22<br>% | 126.93<br>± 0.06 | 0.37%   |
| L-arginine          | 173.1044 | [M-H] <sup>-</sup>  | 138.47<br>± 0.15 | 138.24<br>± 0.27 | 138.41<br>± 0.21 | 138.37<br>± 0.21 | 0.15<br>% | 138.03<br>± 0.06 | 0.25%   |
| L-arginine          | 175.119  | [M+H] <sup>+</sup>  | 136.87<br>± 0.15 | 136.63<br>± 0.00 | 136.43<br>± 0.00 | 136.64<br>± 0.20 | 0.15<br>% | 136.84<br>± 0.06 | 0.15%   |
| L-histidine         | 178.0587 | [M+Na] <sup>+</sup> | 135.52<br>± 0.00 | 134.82<br>± 0.20 | 135.19<br>± 0.68 | 135.18<br>± 0.47 | 0.35<br>% | 135.48<br>± 0.50 | 0.22%   |
| L-tyrosine          | 180.0666 | [M-H] <sup>-</sup>  | 146.11<br>± 0.15 | 145.75<br>± 0.12 | 146.11<br>± 0.35 | 145.99<br>± 0.27 | 0.19<br>% | 145.59<br>± 0.35 | 0.28%   |
| L-tyrosine          | 182.0812 | [M+H] <sup>+</sup>  | 146.68<br>± 0.20 | 146.42<br>± 0.31 | 146.55<br>± 0.42 | 146.55<br>± 0.30 | 0.21<br>% | 146.45<br>± 0.21 | 0.07%   |
| Glucose             | 203.0526 | [M+Na] <sup>+</sup> | 147.68<br>± 0.06 | 147.72<br>± 0.15 | 147.32<br>± 0.12 | 147.57<br>± 0.22 | 0.15<br>% | 147.35<br>± 0.29 | 0.15%   |
| L-cystine           | 239.0166 | [M-H] <sup>-</sup>  | 144.64<br>± 0.15 | 144.47<br>± 0.10 | 144.47<br>± 0.27 | 144.53<br>± 0.18 | 0.13<br>% | 144.39<br>± 0.10 | 0.10%   |
| L-cystine           | 241.0311 | [M+H] <sup>+</sup>  | 149.97<br>± 0.12 | 149.57<br>± 0.06 | 149.73<br>± 0.06 | 149.76<br>± 0.19 | 0.13<br>% | 150.08<br>± 0.06 | 0.21%   |
| Pyridoxal Phosphate | 246.0173 | [M-H] <sup>-</sup>  | 150.97<br>± 0.12 | 150.54<br>± 0.15 | 150.94<br>± 0.15 | 150.82<br>± 0.24 | 0.16<br>% | 150.80<br>± 0.10 | 0.01%   |
| Pyridoxal Phosphate | 248.0319 | [M+H] <sup>+</sup>  | 151.73<br>± 0.17 | 151.38<br>± 0.25 | 151.81<br>± 0.00 | 151.64<br>± 0.25 | 0.17<br>% | 151.94<br>± 0.10 | 0.20%   |
| L-cystine           | 263.0131 | [M+Na] <sup>+</sup> | 152.05<br>± 0.15 | 151.34<br>± 0.06 | 151.81<br>± 0.17 | 151.73<br>± 0.33 | 0.22<br>% | 151.81<br>± 0.10 | 0.05%   |
| Pyridoxal Phosphate | 270.0138 | [M+Na] <sup>+</sup> | 162.04<br>± 0.06 | 162.03<br>± 0.21 | 162.03<br>± 0.15 | 162.03<br>± 0.13 | 0.08<br>% | 161.40<br>± 0.20 | 0.39%   |
| Cortisol            | 363.2166 | [M+H] <sup>+</sup>  | 189.68<br>± 0.12 | 188.88<br>± 0.15 | 189.45<br>± 0.06 | 189.34<br>± 0.37 | 0.20<br>% | 189.27<br>± 0.10 | 0.03%   |
| Cortisol            | 385.1985 | [M+Na] <sup>+</sup> | 213.49<br>± 0.15 | 213.91<br>± 0.15 | 214.78<br>± 0.12 | 214.06<br>± 0.58 | 0.27<br>% | 213.72<br>± 0.00 | 0.16%   |
| Levomefolic acid    | 458.1798 | [M-H] <sup>-</sup>  | 200.75<br>± 0.15 | 199.57<br>± 0.00 | 200.37<br>± 0.10 | 200.23<br>± 0.53 | 0.27<br>% | 200.57<br>± 0.12 | 0.17%   |



| Compound          | m/z      | Ion                  | BOKU             | PNNL             | VU               | Average          | % RSD     | Agilent          | % Error |
|-------------------|----------|----------------------|------------------|------------------|------------------|------------------|-----------|------------------|---------|
| Levome-folic acid | 460.1939 | [M+H] <sup>+</sup>   | 197.92<br>± 0.23 | 196.85<br>± 0.27 | 197.12<br>± 0.06 | 197.30<br>± 0.52 | 0.26<br>% | 197.52<br>± 0.27 | 0.11%   |
| <b>Peptides</b>   |          |                      |                  |                  |                  |                  |           |                  |         |
| GITWK             | 302.6763 | [M+2H] <sup>2+</sup> | 275.31<br>± 1.65 | 276.85<br>± 0.65 | 272.22<br>± 0.38 | 274.79<br>± 2.23 | 0.81<br>% | 273.43<br>± 0.21 | 0.50%   |
| IFVQK             | 317.6998 | [M+2H] <sup>2+</sup> | 285.07<br>± 0.04 | 289.88<br>± 1.92 | 284.96<br>± 0.36 | 286.64<br>± 2.62 | 0.91<br>% | 285.50<br>± 0.25 | 0.40%   |
| Angiotensin I     | 324.93   | [M+4H] <sup>4+</sup> | 546.49<br>± 0.32 | 548.67<br>± 0.38 | 552.75<br>± 0.41 | 549.30<br>± 2.77 | 0.50<br>% | 549.24<br>± 0.06 | 0.01%   |
| YIPGTK            | 339.6947 | [M+2H] <sup>2+</sup> | 291.90<br>± 0.16 | 293.54<br>± 0.38 | 291.56<br>± 0.05 | 292.34<br>± 0.94 | 0.32<br>% | 292.28<br>± 0.38 | 0.02%   |
| Angiotensin II    | 349.52   | [M+3H] <sup>3+</sup> | 433.38<br>± 0.12 | 435.63<br>± 0.56 | 437.91<br>± 0.06 | 435.64<br>± 1.98 | 0.45<br>% | 436.24<br>± 0.21 | 0.14%   |
| Bradykinin        | 354.19   | [M+3H] <sup>3+</sup> | 445.98<br>± 0.46 | 448.16<br>± 0.41 | 447.29<br>± 0.10 | 447.15<br>± 1.00 | 0.22<br>% | 447.61<br>± 0.12 | 0.10%   |
| MIFAGIK           | 390.2278 | [M+2H] <sup>2+</sup> | 305.00<br>± 0.13 | 307.12<br>± 1.00 | 304.74<br>± 0.06 | 305.62<br>± 1.24 | 0.40<br>% | 305.66<br>± 0.06 | 0.01%   |
| Angiotensin I     | 432.90   | [M+3H] <sup>3+</sup> | 474.60<br>± 0.15 | 476.05<br>± 0.36 | 475.71<br>± 0.21 | 475.45<br>± 0.69 | 0.15<br>% | 474.71<br>± 0.15 | 0.16%   |
| Renin             | 440.49   | [M+4H] <sup>4+</sup> | 634.53<br>± 0.38 | 636.34<br>± 0.99 | 637.34<br>± 0.35 | 636.07<br>± 1.36 | 0.21<br>% | 634.60<br>± 0.35 | 0.23%   |
| Substance P       | 449.92   | [M+3H] <sup>3+</sup> | 493.97<br>± 0.52 | 497.36<br>± 1.13 | 497.83<br>± 0.55 | 496.39<br>± 1.94 | 0.39<br>% | 495.74<br>± 1.29 | 0.13%   |
| EDLIAYL K         | 482.7711 | [M+2H] <sup>2+</sup> | 340.62<br>± 0.88 | 345.04<br>± 0.27 | 340.02<br>± 0.10 | 341.89<br>± 2.42 | 0.71<br>% | 340.98<br>± 0.06 | 0.27%   |
| Angiotensin II    | 523.78   | [M+2H] <sup>2+</sup> | 354.86<br>± 0.06 | 354.43<br>± 0.65 | 355.97<br>± 0.31 | 355.09<br>± 0.78 | 0.22<br>% | 353.79<br>± 0.17 | 0.37%   |
| Bradykinin        | 530.79   | [M+2H] <sup>2+</sup> | 343.20<br>± 0.12 | 343.47<br>± 0.65 | 344.24<br>± 0.36 | 343.64<br>± 0.60 | 0.17<br>% | 343.33<br>± 0.10 | 0.09%   |
| Neurotensin       | 558.31   | [M+3H] <sup>3+</sup> | 526.11<br>± 0.00 | 525.54<br>± 1.01 | 527.92<br>± 0.46 | 526.53<br>± 1.21 | 0.23<br>% | 525.02<br>± 0.23 | 0.29%   |
| Melittin          | 569.96   | [M+5H] <sup>5+</sup> | 809.60<br>± 0.25 | 811.40<br>± 0.61 | 812.91<br>± 0.98 | 811.30<br>± 1.55 | 0.19<br>% | 808.61<br>± 0.60 | 0.33%   |
| Melittin          | 569.96   | [M+5H] <sup>5+</sup> | 850.35<br>± 0.46 | 853.16<br>± 1.93 | 852.56<br>± 0.52 | 852.02<br>± 1.64 | 0.19<br>% | 844.40<br>± 0.25 | 0.90%   |
| TGPNLH-GLFGR      | 584.8147 | [M+2H] <sup>2+</sup> | 367.46<br>± 0.53 | 372.56<br>± 0.32 | 367.77<br>± 0.17 | 369.26<br>± 2.50 | 0.68<br>% | 369.09<br>± 0.10 | 0.05%   |
| Renin             | 586.98   | [M+3H] <sup>3+</sup> | 520.99<br>± 0.20 | 519.58<br>± 0.82 | 521.76<br>± 0.45 | 520.77<br>± 1.07 | 0.21<br>% | 518.81<br>± 0.36 | 0.38%   |
| GITWK             | 604.3453 | [M+H] <sup>+</sup>   | 237.30<br>± 0.55 | 238.31<br>± 0.15 | 236.80<br>± 0.06 | 237.47<br>± 0.72 | 0.31<br>% | 236.33<br>± 0.12 | 0.48%   |
| IFVQK             | 634.3922 | [M+H] <sup>+</sup>   | 250.00<br>± 0.41 | 250.71<br>± 0.23 | 249.06<br>± 0.12 | 249.93<br>± 0.75 | 0.30<br>% | 248.88<br>± 0.15 | 0.42%   |
| Angiotensin I     | 648.85   | [M+2H] <sup>2+</sup> | 387.37<br>± 0.20 | 386.13<br>± 1.12 | 388.41<br>± 0.15 | 387.30<br>± 1.14 | 0.30<br>% | 387.30<br>± 0.20 | 0.00%   |
| Substance P       | 674.37   | [M+2H] <sup>2+</sup> | 399.77<br>± 0.06 | 398.87<br>± 0.46 | 400.88<br>± 0.41 | 399.84<br>± 0.93 | 0.23<br>% | 399.88<br>± 0.20 | 0.01%   |
| YIPGTK            | 678.3821 | [M+H] <sup>+</sup>   | 255.94<br>± 0.73 | 256.30<br>± 0.15 | 254.93<br>± 0.12 | 255.72<br>± 0.72 | 0.28<br>% | 254.75<br>± 0.15 | 0.38%   |

| Compound                | m/z      | Ion                    | BOKU              | PNNL               | VU                | Average            | % RSD     | Agilent           | % Error |
|-------------------------|----------|------------------------|-------------------|--------------------|-------------------|--------------------|-----------|-------------------|---------|
| Melittin                | 712.20   | [M+4H] <sup>4+</sup>   | 760.16<br>± 0.20  | 757.08<br>± 0.06   | 760.03<br>± 0.51  | 759.09<br>± 1.53   | 0.20<br>% | 756.79<br>± 0.53  | 0.30%   |
| TGQAPGF<br>TYTDANK      | 735.8466 | [M+2H] <sup>2+</sup>   | 399.13<br>± 0.44  | 402.95<br>± 0.27   | 398.10<br>± 0.06  | 400.06<br>± 2.23   | 0.56<br>% | 399.01<br>± 0.21  | 0.26%   |
| EETLME-<br>YLENPK       | 748.3529 | [M+2H] <sup>2+</sup>   | 413.21<br>± 0.36  | 418.20<br>± 0.32   | 414.32<br>± 0.10  | 415.24<br>± 2.28   | 0.55<br>% | 414.23<br>± 0.21  | 0.24%   |
| MIFAGIK                 | 779.4484 | [M+H] <sup>+</sup>     | 276.71<br>± 0.45  | 277.01<br>± 0.21   | 275.74<br>± 0.06  | 276.49<br>± 0.63   | 0.23<br>% | 275.34<br>± 0.06  | 0.42%   |
| Neurotensin             | 836.96   | [M+2H] <sup>2+</sup>   | 435.96<br>± 0.21  | 434.89<br>± 0.50   | 434.89<br>± 0.32  | 435.25<br>± 0.62   | 0.14<br>% | 434.32<br>± 0.21  | 0.21%   |
| Renin                   | 879.97   | [M+2H] <sup>2+</sup>   | 461.37<br>± 0.17  | 461.10<br>± 0.55   | 462.27<br>± 0.40  | 461.58<br>± 0.64   | 0.14<br>% | 460.39<br>± 0.41  | 0.26%   |
| Melittin                | 949.26   | [M+3H] <sup>3+</sup>   | 724.17<br>± 0.17  | 720.95<br>± 0.36   | 723.47<br>± 0.36  | 722.86<br>± 1.49   | 0.21<br>% | 721.07<br>± 0.53  | 0.25%   |
| EDLIAYL<br>K            | 964.5349 | [M+H] <sup>+</sup>     | 310.63<br>± 2.41  | 308.68<br>± 0.06   | 308.15<br>± 0.17  | 309.15<br>± 1.66   | 0.54<br>% | 307.47<br>± 0.12  | 0.55%   |
| Angiotensin<br>II       | 1046.54  | [M+H] <sup>+</sup>     | 313.48<br>± 0.10  | 314.20<br>± 0.46   | 313.95<br>± 0.23  | 313.87<br>± 0.41   | 0.13<br>% | 314.38<br>± 0.15  | 0.16%   |
| Bradykinin              | 1060.57  | [M+H] <sup>+</sup>     | 314.35<br>± 0.38  | 312.97<br>± 0.76   | 314.88<br>± 0.70  | 314.07<br>± 1.02   | 0.32<br>% | 315.25<br>± 0.30  | 0.38%   |
| TGPNLH-<br>GLFGR<br>1   | 1168.622 | [M+H] <sup>+</sup>     | 331.20<br>± 0.32  | 331.37<br>± 0.60   | 331.94<br>± 0.12  | 331.51<br>± 0.48   | 0.15<br>% | 331.08<br>± 0.06  | 0.13%   |
| Angiotensin<br>I        | 1296.69  | [M+H] <sup>+</sup>     | 356.01<br>± 0.13  | 355.90<br>± 5.19   | 356.50<br>± 0.11  | 356.14<br>± 2.61   | 0.73<br>% | 357.31<br>± 0.27  | 0.33%   |
| Substance P             | 1347.74  | [M+H] <sup>+</sup>     | 361.00<br>± 0.23  | 359.66<br>± 0.23   | 360.96<br>± 0.31  | 360.54<br>± 0.70   | 0.19<br>% | 362.51<br>± 0.21  | 0.54%   |
| Melittin                | 1423.38  | [M+2H] <sup>2+</sup>   | 612.01<br>± 0.21  | 610.23<br>± 0.91   | 614.12<br>± 0.91  | 612.12<br>± 1.81   | 0.30<br>% | 613.37<br>± 0.12  | 0.20%   |
| TGQAPGF<br>TYTDANK<br>3 | 1470.687 | [M+H] <sup>+</sup>     | 365.59<br>± 3.27  | 366.96<br>± 0.46   | 365.69<br>± 0.25  | 366.08<br>± 1.78   | 0.49<br>% | 365.46<br>± 0.36  | 0.17%   |
| EETLME-<br>YLENPK<br>5  | 1495.698 | [M+H] <sup>+</sup>     | 383.65<br>± 1.14  | 387.44<br>± 0.45   | 386.20<br>± 0.45  | 385.76<br>± 1.80   | 0.47<br>% | 386.80<br>± 0.27  | 0.27%   |
| <b>Proteins</b>         |          |                        |                   |                    |                   |                    |           |                   |         |
| Ubiquitin               | 612.414  | [M+14H] <sup>14+</sup> | 2715.62<br>± 2.44 | 2734.60<br>± 10.02 | 2720.21<br>± 5.17 | 2723.48<br>± 10.34 | 0.38%     | 2727.44<br>± 4.95 | 0.15%   |
| Cytochrome<br>c         | 618.9162 | [M+20H] <sup>20+</sup> | 3826.99<br>± 4.87 | 3852.06<br>± 1.51  | 3818.88<br>± 5.23 | 3832.65<br>± 15.42 | 0.40%     | 3816.11<br>± 0.79 | 0.43%   |
| Cytochrome<br>c         | 651.438  | [M+19H] <sup>19+</sup> | 3757.49<br>± 3.48 | 3767.68<br>± 3.48  | 3746.63<br>± 4.74 | 3757.27<br>± 9.73  | 0.26%     | 3741.89<br>± 0.82 | 0.41%   |
| Ubiquitin               | 659.446  | [M+13H] <sup>13+</sup> | 2578.85<br>± 1.63 | 2591.90<br>± 2.23  | 2588.57<br>± 5.55 | 2586.44<br>± 6.64  | 0.26%     | 2577.71<br>± 0.64 | 0.34%   |
| Cytochrome<br>c         | 687.5725 | [M+18H] <sup>18+</sup> | 3668.95<br>± 0.67 | 3641.74<br>± 1.66  | 3651.62<br>± 0.66 | 3654.10<br>± 11.97 | 0.33%     | 3566.34<br>± 1.57 | 0.03%   |
| Ubiquitin               | 714.316  | [M+12H] <sup>12+</sup> | 2427.98<br>± 2.96 | 2433.11<br>± 5.36  | 2410.61<br>± 8.20 | 2423.90<br>± 11.42 | 0.47%     | 2424.69<br>± 0.88 | 0.03%   |
| Cytochrome<br>c         | 727.9594 | [M+17H] <sup>17+</sup> | 3560.97<br>± 2.41 | 3519.89<br>± 3.84  | 3547.40<br>± 3.42 | 3542.75<br>± 18.35 | 0.52%     | 3538.14<br>± 0.28 | 0.13%   |
| Cytochrome<br>c         | 773.3916 | [M+16H] <sup>16+</sup> | 3435.20<br>± 4.33 | 3436.11<br>± 33.57 | 3423.98<br>± 2.56 | 3431.76<br>± 17.95 | 0.52%     | 3403.30<br>± 2.10 | 0.84%   |

| Compound  | m/z      | Ion                    | BOKU              | PNNL              | VU                | Average           | % RSD | Agilent           | % Error |
|-----------|----------|------------------------|-------------------|-------------------|-------------------|-------------------|-------|-------------------|---------|
| Ubiquitin | 779.161  | [M+11H] <sup>11+</sup> | 2360.15<br>± 0.67 | 2357.44<br>± 3.40 | 2367.36<br>± 4.52 | 2361.65<br>± 5.27 | 0.22% | 2349.14<br>± 0.78 | 0.53%   |
| Ubiquitin | 856.978  | [M+10H] <sup>10+</sup> | 2201.57<br>± 0.86 | 2205.63<br>± 1.30 | 2215.95<br>± 6.15 | 2207.71<br>± 7.16 | 0.32% | 2192.31<br>± 0.61 | 0.70%   |
| Ubiquitin | 952.081  | [M+9H] <sup>9+</sup>   | 2073.39<br>± 1.04 | 2066.92<br>± 2.63 | 2066.28<br>± 5.75 | 2068.86<br>± 4.68 | 0.23% | 2052.43<br>± 0.65 | 0.80%   |
| Ubiquitin | 1070.964 | [M+8H] <sup>8+</sup>   | 1962.83<br>± 0.85 | 1964.24<br>± 3.32 | 1963.20<br>± 4.37 | 1963.42<br>± 2.85 | 0.15% | 1950.96<br>± 0.24 | 0.64%   |
| Ubiquitin | 1223.8   | [M+7H] <sup>7+</sup>   | 1783.44<br>± 0.80 | 1784.88<br>± 2.89 | 1771.76<br>± 9.85 | 1780.02<br>± 8.08 | 0.45% | 1773.24<br>± 1.27 | 0.38%   |
| Ubiquitin | 1223.8   | [M+7H] <sup>7+</sup>   | 1880.69<br>± 1.54 | 1885.82<br>± 2.89 | 1894.20<br>± 3.66 | 1886.90<br>± 6.40 | 0.34% | 1875.77<br>± 1.03 | 0.59%   |

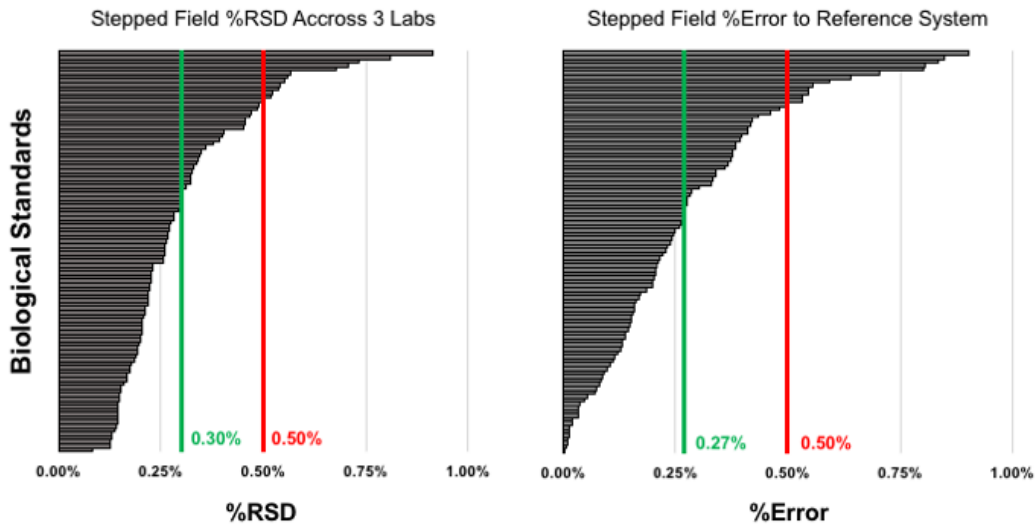

| Precision Across 3 Labs             |       | Percent Error to Agilent Reference System |        |
|-------------------------------------|-------|-------------------------------------------|--------|
| Biological Standard                 | %RSD  | Biological Standard                       | %Error |
| Angiotensin I [M+4H] <sup>4+</sup>  | 0.50% | GITWK [M+2H] <sup>2+</sup>                | 0.50%  |
| Cytochrome c [M+17H] <sup>17+</sup> | 0.52% | L-isoleucine [M+H] <sup>+</sup>           | 0.53%  |
| Cytochrome c [M+16H] <sup>16+</sup> | 0.52% | Ubiquitin [M+11H] <sup>11+</sup>          | 0.53%  |
| EDLIAYLK [M+H] <sup>+</sup>         | 0.54% | Substance P [M+H] <sup>+</sup>            | 0.54%  |
| L-leucine [M-H] <sup>-</sup>        | 0.54% | EDLIAYLK [M+H] <sup>+</sup>               | 0.55%  |
| EETLMEYLENPK [M+2H] <sup>2+</sup>   | 0.55% | L-leucine [M+H] <sup>+</sup>              | 0.56%  |
| TGQAPGFYTDANK [M+2H] <sup>2+</sup>  | 0.56% | Ubiquitin [M+7H] <sup>7+</sup>            | 0.59%  |
| L-leucine [M+H] <sup>+</sup>        | 0.57% | Ubiquitin [M+8H] <sup>8+</sup>            | 0.64%  |
| TGPNLHGLFGR [M+2H] <sup>2+</sup>    | 0.68% | Ubiquitin [M+10H] <sup>10+</sup>          | 0.70%  |
| EDLIAYLK [M+2H] <sup>2+</sup>       | 0.71% | Ubiquitin [M+9H] <sup>9+</sup>            | 0.80%  |
| Angiotensin I [M+H] <sup>+</sup>    | 0.73% | L-leucine [M-H] <sup>-</sup>              | 0.81%  |
| GITWK [M+2H] <sup>2+</sup>          | 0.81% | Cytochrome c [M+16H] <sup>16+</sup>       | 0.84%  |
| IFVQK [M+2H] <sup>2+</sup>          | 0.91% | L-leucine [M-H] <sup>-</sup>              | 0.95%  |
|                                     |       | Melittin [M+5H] <sup>5+</sup>             | 0.90%  |

**Figure S2.** Bar graphs showing the %RSD across the three labs and the %error of the average of the three labs to the Agilent Reference System. The average %RSD and %error is shown in green and an arbitrary threshold of 0.50% is shown in red. The biological standards that fall above the 0.50% threshold are listed in the table with their corresponding %RSD or %error. Reasons why these fall above the 0.50% threshold are discussed in the manuscript.

**Table S12. Single Field CCS Values for Biological Standards (Å<sup>2</sup>)**

| Compound        | m/z      | Ion                | BOKU             | PNNL             | VU               | Average          | % RSD     | Agilent          |
|-----------------|----------|--------------------|------------------|------------------|------------------|------------------|-----------|------------------|
| C12:0           | 199.1704 | [M-H] <sup>-</sup> | 154.39<br>± 0.02 | 155.60<br>± 0.07 | 154.85<br>± 0.06 | 154.95<br>± 0.61 | 0.40<br>% | 154.28<br>± 0.02 |
| C15:0           | 241.2173 | [M-H] <sup>-</sup> | 165.11<br>± 0.01 | 166.13<br>± 0.06 | 165.68<br>± 0.11 | 165.64<br>± 0.51 | 0.31<br>% | 164.86<br>± 0.02 |
| C16:1           | 253.2173 | [M-H] <sup>-</sup> | 167.64<br>± 0.02 | 168.51<br>± 0.07 | 167.79<br>± 0.08 | 167.98<br>± 0.47 | 0.28<br>% | 167.74<br>± 0.05 |
| C16:0           | 255.233  | [M-H] <sup>-</sup> | 169.11<br>± 0.01 | 170.05<br>± 0.03 | 169.53<br>± 0.03 | 169.56<br>± 0.47 | 0.28<br>% | 168.86<br>± 0.08 |
| C17:0           | 269.2486 | [M-H] <sup>-</sup> | 173.34<br>± 0.02 | 173.99<br>± 0.24 | 173.52<br>± 0.04 | 173.62<br>± 0.34 | 0.19<br>% | 172.89<br>± 0.17 |
| C18:3           | 277.2173 | [M-H] <sup>-</sup> | 174.54<br>± 0.02 | 174.92<br>± 0.13 | 174.39<br>± 0.03 | 174.62<br>± 0.28 | 0.16<br>% | 174.28<br>± 0.15 |
| C18:2           | 279.233  | [M-H] <sup>-</sup> | 175.52<br>± 0.01 | 175.96<br>± 0.18 | 175.09<br>± 0.06 | 175.52<br>± 0.44 | 0.25<br>% | 175.10<br>± 0.01 |
| C18:1           | 281.2486 | [M-H] <sup>-</sup> | 175.92<br>± 0.01 | 176.68<br>± 0.13 | 175.95<br>± 0.06 | 176.18<br>± 0.43 | 0.24<br>% | 175.98<br>± 0.02 |
| C18:0           | 283.2643 | [M-H] <sup>-</sup> | 177.47<br>± 0.01 | 178.16<br>± 0.13 | 177.50<br>± 0.03 | 177.71<br>± 0.39 | 0.22<br>% | 177.00<br>± 0.09 |
| C20:4           | 303.233  | [M-H] <sup>-</sup> | 182.32<br>± 0.01 | 184.12<br>± 0.08 | 182.20<br>± 0.20 | 182.88<br>± 1.08 | 0.59<br>% | 182.31<br>± 0.23 |
| C20:3           | 305.2486 | [M-H] <sup>-</sup> | 182.48<br>± 0.01 | 183.03<br>± 0.03 | 182.28<br>± 0.06 | 182.60<br>± 0.39 | 0.21<br>% | 182.18<br>± 0.04 |
| C20:2           | 307.2643 | [M-H] <sup>-</sup> | 182.44<br>± 0.03 | 183.22<br>± 0.67 | 182.40<br>± 0.05 | 182.69<br>± 0.46 | 0.25<br>% | 182.61<br>± 0.00 |
| C20:1           | 309.2799 | [M-H] <sup>-</sup> | 184.60<br>± 0.01 | 184.83<br>± 0.05 | 183.86<br>± 0.09 | 184.43<br>± 0.51 | 0.27<br>% | 183.98<br>± 0.01 |
| C20:0           | 311.2956 | [M-H] <sup>-</sup> | 186.01<br>± 0.03 | 186.63<br>± 0.10 | 185.68<br>± 0.16 | 186.11<br>± 0.48 | 0.26<br>% | 185.45<br>± 0.06 |
| C24:0           | 367.3582 | [M-H] <sup>-</sup> | 201.21<br>± 0.02 | 201.33<br>± 0.16 | 200.50<br>± 0.01 | 201.01<br>± 0.45 | 0.22<br>% | 200.66<br>± 0.05 |
| Creatinine      | 112.0516 | [M-H] <sup>-</sup> | 119.02<br>± 0.62 | 119.58<br>± 0.09 | 119.08<br>± 0.05 | 119.23<br>± 0.31 | 0.26<br>% | 118.84<br>± 0.08 |
| Creatinine      | 114.0662 | [M+H] <sup>+</sup> | 122.81<br>± 0.01 | 123.69<br>± 0.06 | 122.92<br>± 0.13 | 123.14<br>± 0.48 | 0.39<br>% | 122.98<br>± 0.03 |
| L-proline       | 116.0706 | [M+H] <sup>+</sup> | 125.08<br>± 0.04 | 126.25<br>± 0.10 | 125.09<br>± 0.17 | 125.48<br>± 0.67 | 0.54<br>% | 125.38<br>± 0.09 |
| L-leucine       | 130.0874 | [M-H] <sup>-</sup> | 131.00<br>± 0.04 | 131.70<br>± 0.06 | 132.56<br>± 0.02 | 131.75<br>± 0.78 | 0.59<br>% | 131.15<br>± 0.01 |
| L-isoleucine    | 130.0874 | [M-H] <sup>-</sup> | 129.62<br>± 0.03 | 130.28<br>± 0.03 | 130.95<br>± 0.02 | 130.28<br>± 0.66 | 0.51<br>% | 129.83<br>± 0.01 |
| L-aspartic acid | 132.0302 | [M-H] <sup>-</sup> | 118.97<br>± 0.07 | 119.43<br>± 0.15 | 119.35<br>± 0.06 | 119.25<br>± 0.25 | 0.21<br>% | 119.16<br>± 0.04 |
| L-leucine       | 132.1019 | [M+H] <sup>+</sup> | 134.59<br>± 0.07 | 134.84<br>± 0.06 | 135.59<br>± 0.03 | 135.01<br>± 0.52 | 0.39<br>% | 134.58<br>± 0.03 |
| L-isoleucine    | 132.1019 | [M+H] <sup>+</sup> | 132.82<br>± 0.02 | 133.08<br>± 0.08 | 133.83<br>± 0.01 | 133.24<br>± 0.53 | 0.40<br>% | 132.88<br>± 0.04 |

| Compound            | m/z      | Ion                 | BOKU             | PNNL             | VU               | Average          | % RSD     | Agilent          |
|---------------------|----------|---------------------|------------------|------------------|------------------|------------------|-----------|------------------|
| Homocysteine        | 136.0427 | [M+H] <sup>+</sup>  | 130.00<br>± 0.08 | 130.85<br>± 0.12 | 130.73<br>± 0.05 | 130.53<br>± 0.46 | 0.35<br>% | 129.59<br>± 0.63 |
| Creatinine          | 136.0481 | [M+Na] <sup>+</sup> | 132.45<br>± 0.04 | 134.05<br>± 0.05 | 133.05<br>± 0.06 | 133.18<br>± 0.81 | 0.61<br>% | 132.61<br>± 0.36 |
| L-glutamic acid     | 146.0459 | [M-H] <sup>-</sup>  | 124.29<br>± 0.02 | 124.96<br>± 0.19 | 124.55<br>± 0.11 | 124.60<br>± 0.34 | 0.27<br>% | 124.48<br>± 0.01 |
| L-lysine            | 147.1128 | [M+H] <sup>+</sup>  | 130.90<br>± 0.19 | 130.95<br>± 0.11 | 130.45<br>± 0.62 | 130.77<br>± 0.27 | 0.21<br>% | 131.22<br>± 0.14 |
| L-methionine        | 150.0583 | [M+H] <sup>+</sup>  | 133.00<br>± 0.13 | 132.91<br>± 0.25 | 132.89<br>± 0.11 | 132.93<br>± 0.06 | 0.04<br>% | 133.03<br>± 0.48 |
| L-histidine         | 154.0622 | [M-H] <sup>-</sup>  | 128.69<br>± 0.03 | 129.51<br>± 0.04 | 128.87<br>± 0.02 | 129.02<br>± 0.43 | 0.33<br>% | 128.83<br>± 0.01 |
| L-histidine         | 156.0768 | [M+H] <sup>+</sup>  | 131.80<br>± 0.02 | 132.78<br>± 0.06 | 131.83<br>± 0.01 | 132.14<br>± 0.56 | 0.42<br>% | 131.94<br>± 0.03 |
| L-phenylalanine     | 164.0717 | [M-H] <sup>-</sup>  | 139.93<br>± 0.21 | 140.09<br>± 0.57 | 139.91<br>± 0.05 | 139.98<br>± 0.10 | 0.07<br>% | 139.94<br>± 0.04 |
| L-phenylalanine     | 166.0863 | [M+H] <sup>+</sup>  | 140.39<br>± 0.05 | 141.27<br>± 0.02 | 140.21<br>± 0.03 | 140.62<br>± 0.57 | 0.41<br>% | 140.30<br>± 0.13 |
| Uric acid           | 167.0211 | [M-H] <sup>-</sup>  | 125.59<br>± 0.02 | 126.53<br>± 0.09 | 125.66<br>± 0.06 | 125.93<br>± 0.52 | 0.41<br>% | 125.55<br>± 0.07 |
| L-arginine          | 173.1044 | [M-H] <sup>-</sup>  | 137.04<br>± 0.02 | 137.77<br>± 0.14 | 137.16<br>± 0.03 | 137.32<br>± 0.39 | 0.29<br>% | 137.08<br>± 0.02 |
| L-arginine          | 175.119  | [M+H] <sup>+</sup>  | 136.32<br>± 0.01 | 137.37<br>± 0.01 | 136.36<br>± 0.03 | 136.68<br>± 0.59 | 0.43<br>% | 136.45<br>± 0.01 |
| L-histidine         | 178.0587 | [M+Na] <sup>+</sup> | 134.62<br>± 0.10 | 135.60<br>± 0.14 | 134.35<br>± 0.25 | 134.86<br>± 0.66 | 0.49<br>% | 134.40<br>± 0.44 |
| L-tyrosine          | 180.0666 | [M-H] <sup>-</sup>  | 144.40<br>± 0.06 | 145.12<br>± 0.51 | 144.44<br>± 0.09 | 144.65<br>± 0.41 | 0.28<br>% | 144.42<br>± 0.08 |
| L-tyrosine          | 182.0812 | [M+H] <sup>+</sup>  | 145.72<br>± 0.06 | 146.66<br>± 0.20 | 145.51<br>± 0.08 | 145.96<br>± 0.61 | 0.42<br>% | 145.58<br>± 0.13 |
| Glucose             | 203.0526 | [M+Na] <sup>+</sup> | 146.88<br>± 0.00 | 147.67<br>± 0.06 | 146.73<br>± 0.01 | 147.09<br>± 0.50 | 0.34<br>% | 146.94<br>± 0.08 |
| L-cystine           | 239.0166 | [M-H] <sup>-</sup>  | 143.45<br>± 0.03 | 144.19<br>± 0.07 | 143.63<br>± 0.06 | 143.76<br>± 0.38 | 0.27<br>% | 143.58<br>± 0.02 |
| L-cystine           | 241.0311 | [M+H] <sup>+</sup>  | 149.43<br>± 0.02 | 150.52<br>± 0.01 | 149.48<br>± 0.01 | 149.81<br>± 0.62 | 0.41<br>% | 149.48<br>± 0.03 |
| Pyridoxal Phosphate | 246.0173 | [M-H] <sup>-</sup>  | 149.49<br>± 0.03 | 150.44<br>± 0.03 | 149.52<br>± 0.02 | 149.82<br>± 0.54 | 0.36<br>% | 149.36<br>± 0.04 |
| Pyridoxal Phosphate | 248.0319 | [M+H] <sup>+</sup>  | 151.25<br>± 0.01 | 152.42<br>± 0.03 | 151.44<br>± 0.02 | 151.70<br>± 0.63 | 0.41<br>% | 151.37<br>± 0.03 |
| L-cystine           | 263.0131 | [M+Na] <sup>+</sup> | 151.33<br>± 0.04 | 152.30<br>± 0.01 | 151.35<br>± 0.03 | 151.66<br>± 0.56 | 0.37<br>% | 151.26<br>± 0.13 |
| Pyridoxal Phosphate | 270.0138 | [M+Na] <sup>+</sup> | 161.50<br>± 0.07 | 162.64<br>± 0.03 | 161.56<br>± 0.02 | 161.90<br>± 0.64 | 0.40<br>% | 161.47<br>± 0.21 |
| Cortisol            | 363.2166 | [M+H] <sup>+</sup>  | 189.08<br>± 0.04 | 190.30<br>± 0.03 | 188.92<br>± 0.19 | 189.44<br>± 0.76 | 0.40<br>% | 188.34<br>± 0.01 |
| Cortisol            | 385.1985 | [M+Na] <sup>+</sup> | 213.62<br>± 0.08 | 215.03<br>± 0.06 | 213.22<br>± 0.08 | 213.96<br>± 0.95 | 0.44<br>% | 212.80<br>± 0.08 |
| Levomefolic acid    | 458.1798 | [M-H] <sup>-</sup>  | 199.48<br>± 0.00 | 200.15<br>± 0.06 | 199.35<br>± 0.12 | 199.66<br>± 0.43 | 0.22<br>% | 199.00<br>± 0.01 |

| Compound          | m/z      | Ion                  | BOKU             | PNNL             | VU               | Average          | % RSD     | Agilent          |
|-------------------|----------|----------------------|------------------|------------------|------------------|------------------|-----------|------------------|
| Levome-folic acid | 460.1939 | [M+H] <sup>+</sup>   | 197.72<br>± 0.02 | 198.23<br>± 0.59 | 197.39<br>± 0.02 | 197.78<br>± 0.42 | 0.21<br>% | 197.17<br>± 0.04 |
| GITWK             | 302.6763 | [M+2H] <sup>2+</sup> | 273.46<br>± 0.09 | 274.44<br>± 0.33 | 273.64<br>± 0.14 | 273.85<br>± 0.52 | 0.19<br>% | 274.51<br>± 1.02 |
| IFVQK             | 317.6998 | [M+2H] <sup>2+</sup> | 285.90<br>± 0.04 | 287.44<br>± 0.41 | 286.09<br>± 0.02 | 286.47<br>± 0.85 | 0.30<br>% | 286.78<br>± 0.08 |
| Angiotensin I     | 324.93   | [M+4H] <sup>4+</sup> | 548.31<br>± 0.03 | 555.47<br>± 0.15 | 551.96<br>± 0.15 | 551.91<br>± 3.58 | 0.65<br>% | 550.99<br>± 0.07 |
| YIPGTK            | 339.6947 | [M+2H] <sup>2+</sup> | 292.80<br>± 0.04 | 293.03<br>± 0.11 | 292.96<br>± 0.04 | 292.92<br>± 0.13 | 0.04<br>% | 293.76<br>± 0.13 |
| Angiotensin II    | 349.52   | [M+3H] <sup>3+</sup> | 435.39<br>± 0.06 | 441.02<br>± 0.13 | 437.32<br>± 0.31 | 437.91<br>± 2.86 | 0.65<br>% | 437.30<br>± 0.13 |
| Bradykinin        | 354.19   | [M+3H] <sup>3+</sup> | 447.50<br>± 0.29 | 453.08<br>± 0.41 | 448.27<br>± 0.14 | 449.62<br>± 3.02 | 0.67<br>% | 449.08<br>± 0.39 |
| MIFAGIK           | 390.2278 | [M+2H] <sup>2+</sup> | 306.50<br>± 0.04 | 307.30<br>± 0.55 | 306.34<br>± 0.03 | 306.70<br>± 0.52 | 0.17<br>% | 305.56<br>± 0.42 |
| Angiotensin I     | 432.90   | [M+3H] <sup>3+</sup> | 477.40<br>± 0.06 | 481.98<br>± 0.10 | 477.30<br>± 0.06 | 478.89<br>± 2.68 | 0.56<br>% | 477.05<br>± 0.04 |
| Renin             | 440.49   | [M+4H] <sup>4+</sup> | 638.02<br>± 0.41 | 644.69<br>± 0.16 | 638.11<br>± 0.10 | 640.27<br>± 3.82 | 0.60<br>% | 637.65<br>± 0.24 |
| Substance P       | 449.92   | [M+3H] <sup>3+</sup> | 496.17<br>± 0.11 | 502.78<br>± 0.34 | 496.57<br>± 0.26 | 498.51<br>± 3.71 | 0.74<br>% | 496.51<br>± 0.38 |
| EDLIAYL K         | 482.7711 | [M+2H] <sup>2+</sup> | 341.82<br>± 0.09 | 343.80<br>± 0.17 | 342.43<br>± 0.01 | 342.68<br>± 1.01 | 0.30<br>% | 342.46<br>± 0.07 |
| Angiotensin II    | 523.78   | [M+2H] <sup>2+</sup> | 357.15<br>± 0.03 | 358.51<br>± 0.07 | 355.33<br>± 0.05 | 357.00<br>± 1.60 | 0.45<br>% | 355.10<br>± 0.03 |
| Bradykinin        | 530.79   | [M+2H] <sup>2+</sup> | 345.64<br>± 0.03 | 347.81<br>± 0.05 | 345.07<br>± 0.06 | 346.17<br>± 1.44 | 0.42<br>% | 344.99<br>± 0.04 |
| Neurotensin       | 558.31   | [M+3H] <sup>3+</sup> | 530.42<br>± 0.07 | 533.22<br>± 0.08 | 528.55<br>± 0.10 | 530.73<br>± 2.35 | 0.44<br>% | 528.29<br>± 0.03 |
| Melittin          | 569.96   | [M+5H] <sup>5+</sup> | 815.60<br>± 0.12 | 824.14<br>± 0.41 | 816.16<br>± 0.05 | 818.63<br>± 4.78 | 0.58<br>% | 815.39<br>± 0.10 |
| Melittin          | 569.96   | [M+5H] <sup>5+</sup> | 858.72<br>± 0.15 | 867.13<br>± 0.56 | 852.47<br>± 2.60 | 859.44<br>± 7.36 | 0.86<br>% | 854.38<br>± 0.15 |
| TGPNLH-GLFGR      | 584.8147 | [M+2H] <sup>2+</sup> | 369.20<br>± 0.03 | 370.94<br>± 0.11 | 370.02<br>± 0.02 | 370.04<br>± 0.89 | 0.24<br>% | 369.62<br>± 0.10 |
| Renin             | 586.98   | [M+3H] <sup>3+</sup> | 527.10<br>± 0.04 | 528.44<br>± 0.11 | 524.43<br>± 0.13 | 526.66<br>± 2.04 | 0.39<br>% | 524.12<br>± 0.07 |
| GITWK             | 604.3453 | [M+H] <sup>+</sup>   | 238.30<br>± 0.03 | 236.28<br>± 0.23 | 237.19<br>± 0.01 | 237.24<br>± 0.99 | 0.42<br>% | 235.86<br>± 0.01 |
| IFVQK             | 634.3922 | [M+H] <sup>+</sup>   | 250.70<br>± 0.11 | 248.40<br>± 0.22 | 249.19<br>± 0.01 | 249.52<br>± 1.17 | 0.47<br>% | 248.08<br>± 0.02 |
| Angiotensin I     | 648.85   | [M+2H] <sup>2+</sup> | 389.79<br>± 0.02 | 390.60<br>± 0.10 | 388.99<br>± 0.04 | 389.79<br>± 0.81 | 0.21<br>% | 388.41<br>± 0.10 |
| Substance P       | 674.37   | [M+2H] <sup>2+</sup> | 400.99<br>± 0.06 | 402.87<br>± 0.11 | 400.58<br>± 0.04 | 401.48<br>± 1.22 | 0.30<br>% | 400.10<br>± 0.05 |
| YIPGTK            | 678.3821 | [M+H] <sup>+</sup>   | 256.30<br>± 0.00 | 254.21<br>± 0.15 | 255.33<br>± 0.02 | 255.29<br>± 1.06 | 0.41<br>% | 254.03<br>± 0.02 |

| Compound                | m/z      | Ion                    | BOKU              | PNNL               | VU                | Average            | % RSD     | Agilent           |
|-------------------------|----------|------------------------|-------------------|--------------------|-------------------|--------------------|-----------|-------------------|
| Melittin                | 712.20   | [M+4H] <sup>4+</sup>   | 764.81<br>± 0.06  | 765.89<br>± 0.23   | 761.71<br>± 0.07  | 764.14<br>± 2.17   | 0.28<br>% | 760.82<br>± 0.13  |
| TGQAPGF<br>TYTDANK      | 735.8466 | [M+2H] <sup>2+</sup>   | 400.90<br>± 0.06  | 401.40<br>± 0.13   | 400.85<br>± 0.04  | 401.03<br>± 0.32   | 0.08<br>% | 399.97<br>± 0.13  |
| EETLME-<br>YLENPK       | 748.3529 | [M+2H] <sup>2+</sup>   | 415.70<br>± 0.03  | 415.98<br>± 0.41   | 416.73<br>± 0.07  | 416.15<br>± 0.52   | 0.13<br>% | 414.73<br>± 0.09  |
| MIFAGIK                 | 779.4484 | [M+H] <sup>+</sup>     | 277.10<br>± 0.03  | 274.37<br>± 0.18   | 276.03<br>± 0.01  | 275.81<br>± 1.35   | 0.49<br>% | 274.49<br>± 0.02  |
| Neurotensin             | 836.96   | [M+2H] <sup>2+</sup>   | 437.38<br>± 0.04  | 438.85<br>± 0.07   | 435.13<br>± 0.03  | 437.12<br>± 1.87   | 0.43<br>% | 435.43<br>± 0.07  |
| Renin                   | 879.97   | [M+2H] <sup>2+</sup>   | 462.46<br>± 0.08  | 465.36<br>± 0.10   | 461.25<br>± 0.06  | 463.02<br>± 2.12   | 0.46<br>% | 461.12<br>± 0.04  |
| Melittin                | 949.26   | [M+3H] <sup>3+</sup>   | 725.02<br>± 0.04  | 728.30<br>± 0.07   | 721.95<br>± 0.06  | 725.09<br>± 3.18   | 0.44<br>% | 722.45<br>± 0.02  |
| EDLIAYL<br>K            | 964.5349 | [M+H] <sup>+</sup>     | 308.42<br>± 0.55  | 305.96<br>± 0.18   | 308.52<br>± 0.02  | 307.63<br>± 1.45   | 0.47<br>% | 306.57<br>± 0.03  |
| Angiotensin<br>II       | 1046.54  | [M+H] <sup>+</sup>     | 313.21<br>± 0.11  | 315.67<br>± 0.56   | 313.33<br>± 0.03  | 314.07<br>± 1.39   | 0.44<br>% | 313.66<br>± 0.03  |
| Bradykinin              | 1060.57  | [M+H] <sup>+</sup>     | 313.53<br>± 0.05  | 316.25<br>± 0.70   | 313.63<br>± 0.12  | 314.47<br>± 1.54   | 0.49<br>% | 314.00<br>± 0.12  |
| TGPNLH-<br>GLFGR<br>1   | 1168.622 | [M+H] <sup>+</sup>     | 331.53<br>± 0.26  | 329.44<br>± 0.61   | 332.09<br>± 0.03  | 331.02<br>± 1.39   | 0.42<br>% | 330.07<br>± 0.02  |
| Angiotensin<br>I        | 1296.69  | [M+H] <sup>+</sup>     | 354.77<br>± 0.12  | 358.49<br>± 0.48   | 355.11<br>± 0.10  | 356.12<br>± 2.06   | 0.58<br>% | 355.62<br>± 0.41  |
| Substance P             | 1347.74  | [M+H] <sup>+</sup>     | 360.09<br>± 0.07  | 363.37<br>± 0.30   | 360.49<br>± 0.07  | 361.32<br>± 1.79   | 0.50<br>% | 361.44<br>± 0.04  |
| Melittin                | 1423.38  | [M+2H] <sup>2+</sup>   | 613.42<br>± 0.13  | 618.59<br>± 0.37   | 613.64<br>± 0.08  | 615.22<br>± 2.92   | 0.48<br>% | 614.26<br>± 0.03  |
| TGQAPGF<br>TYTDANK<br>3 | 1470.687 | [M+H] <sup>+</sup>     | 365.37<br>± 0.60  | 363.50<br>± 0.47   | 366.08<br>± 0.26  | 364.98<br>± 1.33   | 0.37<br>% | 364.37<br>± 0.18  |
| EETLME-<br>YLENPK<br>5  | 1495.698 | [M+H] <sup>+</sup>     | 385.83<br>± 1.33  | 384.62<br>± 0.64   | 386.77<br>± 0.11  | 385.74<br>± 1.08   | 0.28<br>% | 384.84<br>± 1.32  |
| Ubiquitin               | 612.414  | [M+14H] <sup>14+</sup> | 2728.47<br>± 1.57 | 2725.64<br>± 6.73  | 2731.76<br>± 0.59 | 2728.62<br>± 3.06  | 0.11<br>% | 2728.87<br>± 1.74 |
| Cytochrome<br>c         | 618.9162 | [M+20H] <sup>20+</sup> | 3842.93<br>± 0.84 | 3851.74<br>± 0.00  | 3829.88<br>± 0.00 | 3841.52<br>± 11.00 | 0.29<br>% | 3832.36<br>± 0.00 |
| Cytochrome<br>c         | 651.438  | [M+19H] <sup>19+</sup> | 3768.76<br>± 1.60 | 3760.52<br>± 4.36  | 3759.95<br>± 0.79 | 3763.08<br>± 4.93  | 0.13<br>% | 3757.99<br>± 0.00 |
| Ubiquitin               | 659.446  | [M+13H] <sup>13+</sup> | 2592.02<br>± 0.00 | 2595.43<br>± 1.43  | 2604.75<br>± 0.54 | 2597.40<br>± 6.59  | 0.25<br>% | 2594.38<br>± 0.54 |
| Cytochrome<br>c         | 687.5725 | [M+18H] <sup>18+</sup> | 3680.42<br>± 0.76 | 3656.05<br>± 15.24 | 3670.27<br>± 1.99 | 3668.91<br>± 12.24 | 0.33<br>% | 3670.41<br>± 0.75 |
| Ubiquitin               | 714.316  | [M+12H] <sup>12+</sup> | 2443.35<br>± 0.51 | 2441.14<br>± 1.32  | 2460.31<br>± 0.00 | 2448.27<br>± 10.49 | 0.43<br>% | 2444.26<br>± 0.00 |
| Cytochrome<br>c         | 727.9594 | [M+17H] <sup>17+</sup> | 3572.41<br>± 1.24 | 3520.95<br>± 3.90  | 3560.36<br>± 0.71 | 3551.24<br>± 26.91 | 0.76<br>% | 3554.73<br>± 0.70 |
| Cytochrome<br>c         | 773.3916 | [M+16H] <sup>16+</sup> | 3445.64<br>± 1.35 | 3391.96<br>± 2.38  | 3439.01<br>± 0.67 | 3425.54<br>± 29.27 | 0.85<br>% | 3420.25<br>± 2.39 |



| Compound  | m/z      | Ion                    | BOKU              | PNNL              | VU                | Average            | % RSD     | Agilent           |
|-----------|----------|------------------------|-------------------|-------------------|-------------------|--------------------|-----------|-------------------|
| Ubiquitin | 779.161  | [M+11H] <sup>11+</sup> | 2362.82<br>± 0.47 | 2359.54<br>± 0.00 | 2378.26<br>± 0.46 | 2366.87<br>± 10.00 | 0.42<br>% | 2362.34<br>± 0.00 |
| Ubiquitin | 856.978  | [M+10H] <sup>10+</sup> | 2212.27<br>± 0.73 | 2203.54<br>± 0.72 | 2223.39<br>± 0.00 | 2213.07<br>± 9.95  | 0.45<br>% | 2204.84<br>± 0.41 |
| Ubiquitin | 952.081  | [M+9H] <sup>9+</sup>   | 2077.68<br>± 0.38 | 2067.26<br>± 0.38 | 2076.24<br>± 0.38 | 2073.73<br>± 5.64  | 0.27<br>% | 2063.50<br>± 0.00 |
| Ubiquitin | 1070.964 | [M+8H] <sup>8+</sup>   | 1969.37<br>± 0.34 | 1963.92<br>± 0.00 | 1972.07<br>± 0.33 | 1968.45<br>± 4.15  | 0.21<br>% | 1960.53<br>± 0.33 |
| Ubiquitin | 1223.8   | [M+7H] <sup>7+</sup>   | 1789.38<br>± 0.30 | 1784.66<br>± 0.51 | 1789.80<br>± 0.59 | 1787.95<br>± 2.85  | 0.16<br>% | 1785.41<br>± 0.29 |
| Ubiquitin | 1223.8   | [M+7H] <sup>7+</sup>   | 1885.66<br>± 0.51 | 1886.96<br>± 0.29 | 1843.71<br>± 0.29 | 1872.11<br>± 24.60 | 1.31<br>% | 1884.36<br>± 0.29 |

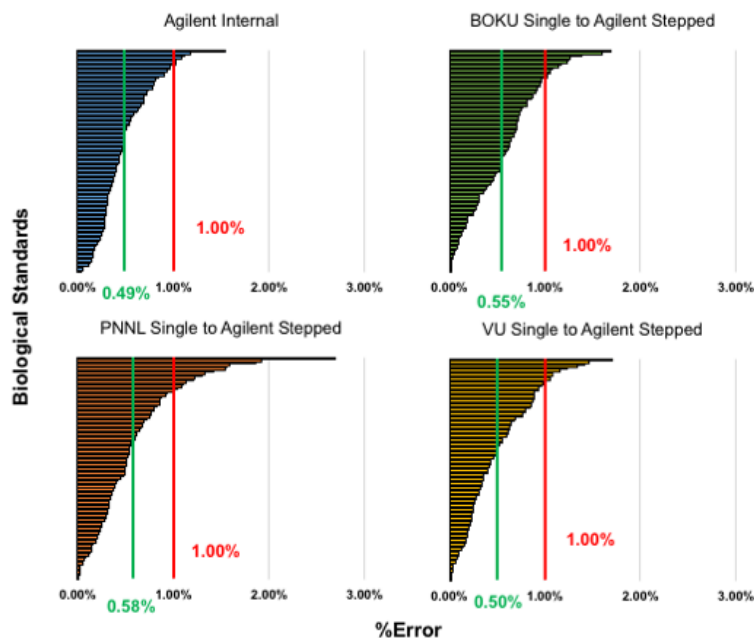

| Agilent                             |       | BOKU                                |        |
|-------------------------------------|-------|-------------------------------------|--------|
| Biological Standard                 | %RSD  | Biological Standard                 | %Error |
| Renin [M+3H] <sup>3+</sup>          | 1.02% | Uric acid                           | 1.00%  |
| L-aspartic acid                     | 1.03% | Ubiquitin [M+13H] <sup>13+</sup>    | 1.05%  |
| L-leucine                           | 1.03% | Cytochrome c [M+16H] <sup>16+</sup> | 1.05%  |
| Uric acid                           | 1.08% | Ubiquitin [M+8H] <sup>8+</sup>      | 1.08%  |
| L-isoleucine                        | 1.11% | Renin [M+3H] <sup>3+</sup>          | 1.08%  |
| Melittin [M+5H] <sup>5+</sup>       | 1.18% | Ubiquitin [M+9H] <sup>9+</sup>      | 1.16%  |
| Creatinine                          | 1.54% | Ubiquitin [M+11H] <sup>11+</sup>    | 1.24%  |
| <b>PNNL</b>                         |       | Creatinine                          | 1.34%  |
| Melittin [M+3H] <sup>3+</sup>       | 1.00% | Ubiquitin [M+10H] <sup>10+</sup>    | 1.42%  |
| Neurotensin [M+2H] <sup>2+</sup>    | 1.04% | Ubiquitin [M+12H] <sup>12+</sup>    | 1.47%  |
| Renin [M+2H] <sup>2+</sup>          | 1.08% | Ubiquitin [M+7H] <sup>7+</sup>      | 1.71%  |
| Angiotensin II [M+2H] <sup>2+</sup> | 1.10% | <b>Vanderbilt</b>                   |        |
| Angiotensin I [M+2H] <sup>2+</sup>  | 1.13% | L-histidine                         | 1.02%  |
| Melittin [M+4H] <sup>4+</sup>       | 1.20% | Neurotensin [M+3H] <sup>3+</sup>    | 1.03%  |
| Bradykinin [M+3H] <sup>3+</sup>     | 1.22% | Uric acid                           | 1.05%  |
| Bradykinin [M+2H] <sup>2+</sup>     | 1.30% | Melittin [M+4H] <sup>4+</sup>       | 1.06%  |
| Angiotensin II [M+2H] <sup>2+</sup> | 1.33% | L-glutamic acid                     | 1.08%  |
| Substance P [M+3H] <sup>3+</sup>    | 1.42% | L-leucine                           | 1.14%  |
| Angiotensin I [M+3H] <sup>3+</sup>  | 1.53% | L-aspartic acid                     | 1.18%  |
| Neurotensin [M+3H] <sup>3+</sup>    | 1.56% | Ubiquitin [M+9H] <sup>9+</sup>      | 1.23%  |
| Renin [M+4H] <sup>4+</sup>          | 1.59% | Cytochrome c [M+16H] <sup>16+</sup> | 1.24%  |
| Renin [M+3H] <sup>3+</sup>          | 1.86% | L-isoleucine                        | 1.27%  |
| Melittin [M+5H] <sup>5+</sup>       | 1.92% | Creatinine                          | 1.39%  |
| Melittin [M+5H] <sup>5+</sup>       | 2.69% | Renin [M+3H] <sup>3+</sup>          | 1.60%  |
|                                     |       | Melittin [M+5H] <sup>5+</sup>       | 1.70%  |

**Figure S3.** Absolute error of single field CCS values compared to stepped field CCS values obtained on the Reference System. The biological samples listed in the table are those that fall above 1% error. The reasons for the larger deviations are discussed in the manuscript.

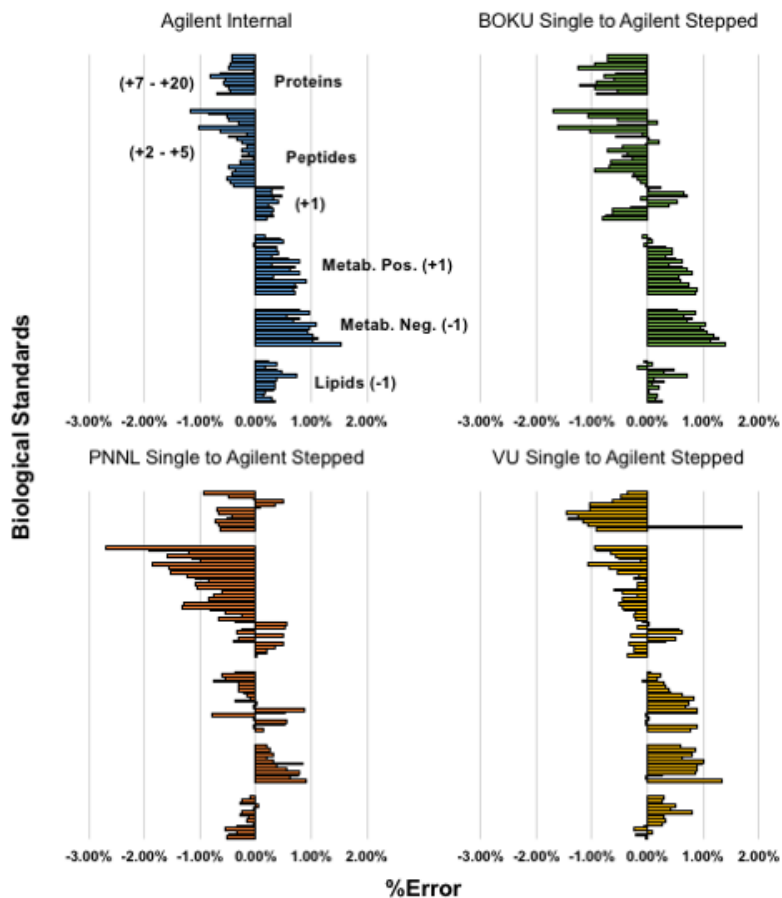

**Figure S4.** The bar graphs from Figure 4B comparing single field CCS values from each lab to stepped field CCS values on the Reference System are shown separately for clarity. The molecular classes are listed on the “Agilent Internal” plot with the other three plots following the same order.

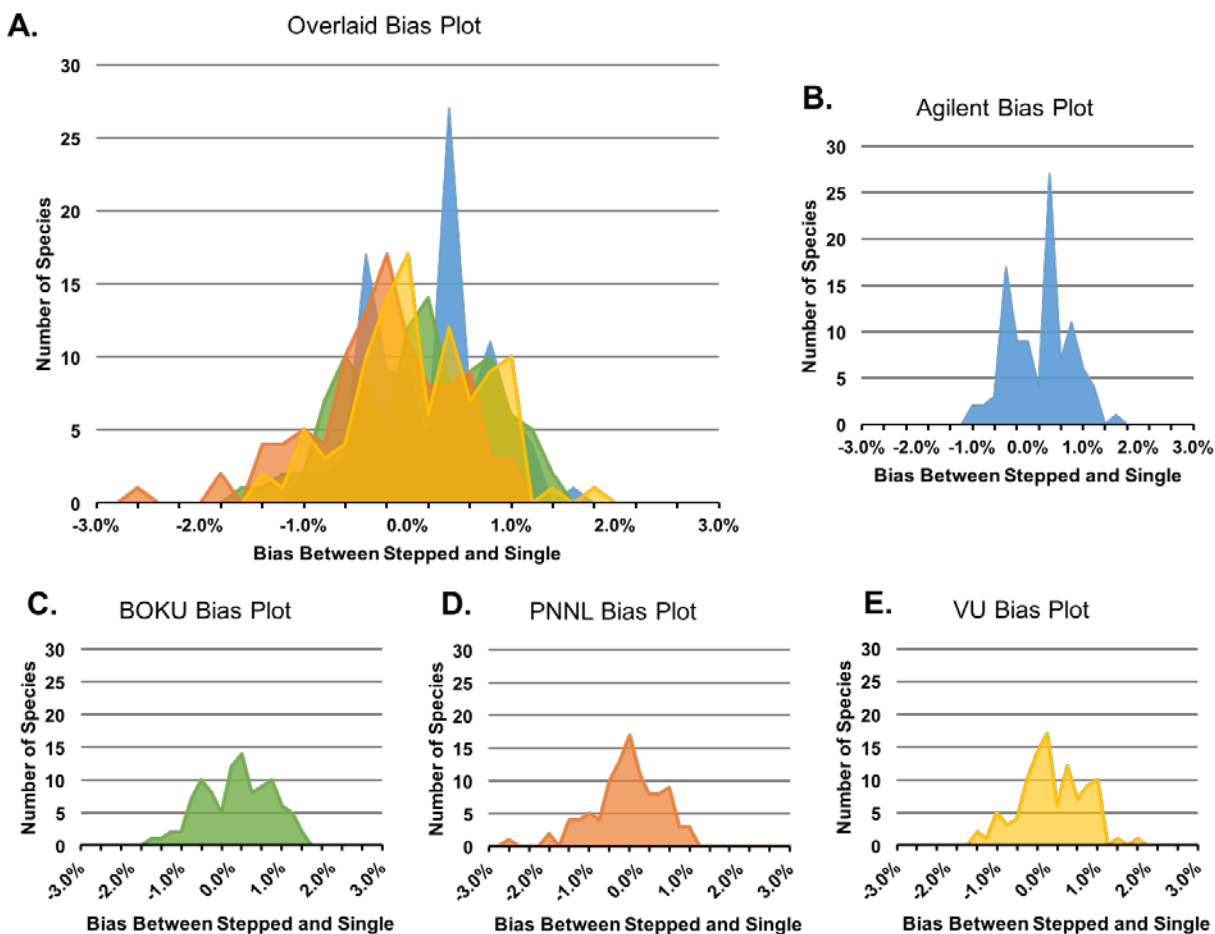

**Figure S5.** Bias plots for single field data from each lab compared to stepped field data acquired on the Reference System. Results for all 4 labs are overlaid in A. Results for each lab are shown on individual plots for clarity for B. Agilent, C. BOKU, D. PNNL, and E. Vanderbilt. These plots further emphasize that a majority of the single field CCS measurements are within 1% across the four labs.

## Theoretical Simulation Details

Theoretical CCS ranges were determined for the molecules examined in this study. This involved the classic two step approach of sampling conformational space of each molecule followed by a theoretical CCS calculation for each conformation. Initial structures were either optimized in Gaussian09<sup>1</sup> or built in MOE<sup>2</sup> or XLEAP<sup>3</sup> software. Gaussian was used for molecules under 800 Da to obtain an electrostatic description of the molecule. Peptides larger than 800 Da were built in XLEAP with both existing amino acid residues and Gaussian optimized residues for those not included in XLEAP (i.e. –COOH capped C-termini, N-termini with neutralized side chains) to better mimic the gas-phase charged species. Distance geometry, a computationally-inexpensive method, was utilized allowing a large number of conformers (1-20,000 depending on molecule size and flexibility) to be generated in a short amount of CPU time (usually hours when parallelized).<sup>4</sup> Distance geometry is mathematical approach to sampling conformational space as it treats all the atoms in the molecule as points in space and uses linear algebra to convert a set of distance between all pairwise points to three dimensional coordinates of a molecule. The mathematical basis of this approach allows it to randomly sample conformational space very quickly. This gives us confidence that we are sampling all conformational space of the molecules in this study in a very time efficient manner. The resulting conformations from distance geometry were submitted to an energy minimization in Amber to create low energy conformations.

All conformations were then submitted to MOBCAL<sup>5</sup> to calculate a projection approximation (PA) theoretical CCS value. PA in MOBCAL calculates theoretical CCS values very quickly, but these theoretical CCS values can only be aligned with helium data. Based on the PA, helium CCS values and RMSD clustering a subset of conformers is selected for submission to the projected superposition approximation (PSA)<sup>6-9</sup> webserver. PSA also determines theoretical CCS values very quickly and has a set of preliminary nitrogen parameters so theoretical nitrogen CCS values can be determined. Since the current format of PSA is through their webserver submitting 20,000 conformations is not possible so selecting a subset of these conformations is desirable. Based on the MOBCAL PA CCS calculation the 10 highest and 10 lowest PA, helium CCS conformers are selected along with 20 low energy conformations that span the entire PA, helium CCS range. An additional 20 conformers are selected based on RMSD clustering, meaning the 20 most structurally unique conformations are also selected for submission to PSA. This set of 60 conformers is reasonable for submission to PSA and should be sufficient to give us a theoretical CCS range in nitrogen space for the molecules in this study.

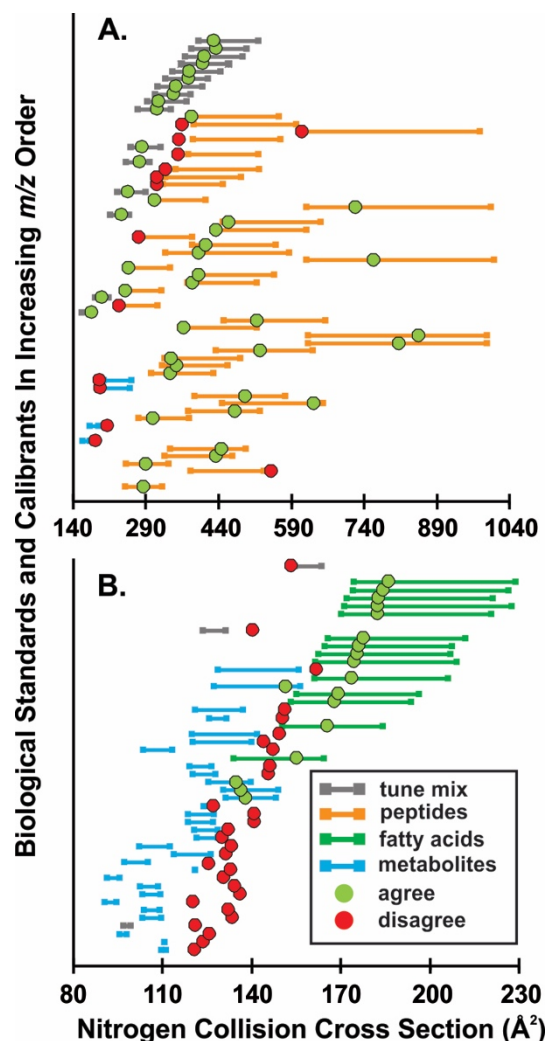

**Figure S6.** Comparison of experimental stepped field CCS values to CCS ranges based on computational conformational space sampling are shown in A. for larger molecules and in B. for smaller molecules. Computational results are represented with horizontal bars colored according to molecular class. Experimental values are overlaid as either green circles showing agreement or red circles showing disagreement. Ions are listed in increasing  $m/z$  order to avoid overlap of isomers and dense  $m/z$  regions specifically at low masses. Agreement between experiment and theory varies based on chemical class and molecule size. Good agreement is observed for tune mix ions above 600  $m/z$  as shown in **Figure S6A**, but not for smaller tune mix ions (118-322  $m/z$ ) in **Figure S6B**. Peptide ions which range from 300-1500  $m/z$  and +1 to +5 charge states in **Figure S6A** show good agreement between experiment and theory. Fatty acids which range from 200-368  $m/z$  in **Figure S6B** also show excellent agreement between theoretical ranges and experimental CCS measurements. In contrast, the theoretical methods used here generated CCS ranges which did not encompass experimental CCS values for the majority of metabolites ions in **Figure S6B**, all of which are below 500  $m/z$ . It is noted here that the PSA nitrogen parameters used are preliminary and were not developed for small molecule CCS prediction.<sup>6-9</sup> For small molecules, the contribution of the cross section of the nitrogen buffer gas becomes significant, and experimental  $\text{CCS}_{\text{N}_2}$  values obtained at low CCS ranges should converge on the CCS of the

nitrogen gas polarization limit (ca.  $93 \text{ \AA}^2$ ),<sup>10</sup> which is evident in the experimental values in **Figure S6B**. While other calculations exist for computing theoretical CCS values such as the trajectory method which better simulates the effect of nitrogen as a buffer gas, this method is much more computationally expensive than PSA. This is a concern when attempting to calculate theoretical CCS values for a large number of conformations that span the conformational space of even small molecules like many of the metabolites investigated in this work. Although more work could be done in attempt to provide more accurate theoretical CCS values the work in its current state serves two main purposes. First, to show how current theoretical methods would benefit from future parameterization which relies on accurate experimental CCS values presented in this manuscript. Second, this work provides visual insight into the conformational landscape of the molecules in this study and the theoretical CCS values that currently represent them. Conformations representing these ranges are included in Figure S6-S19.

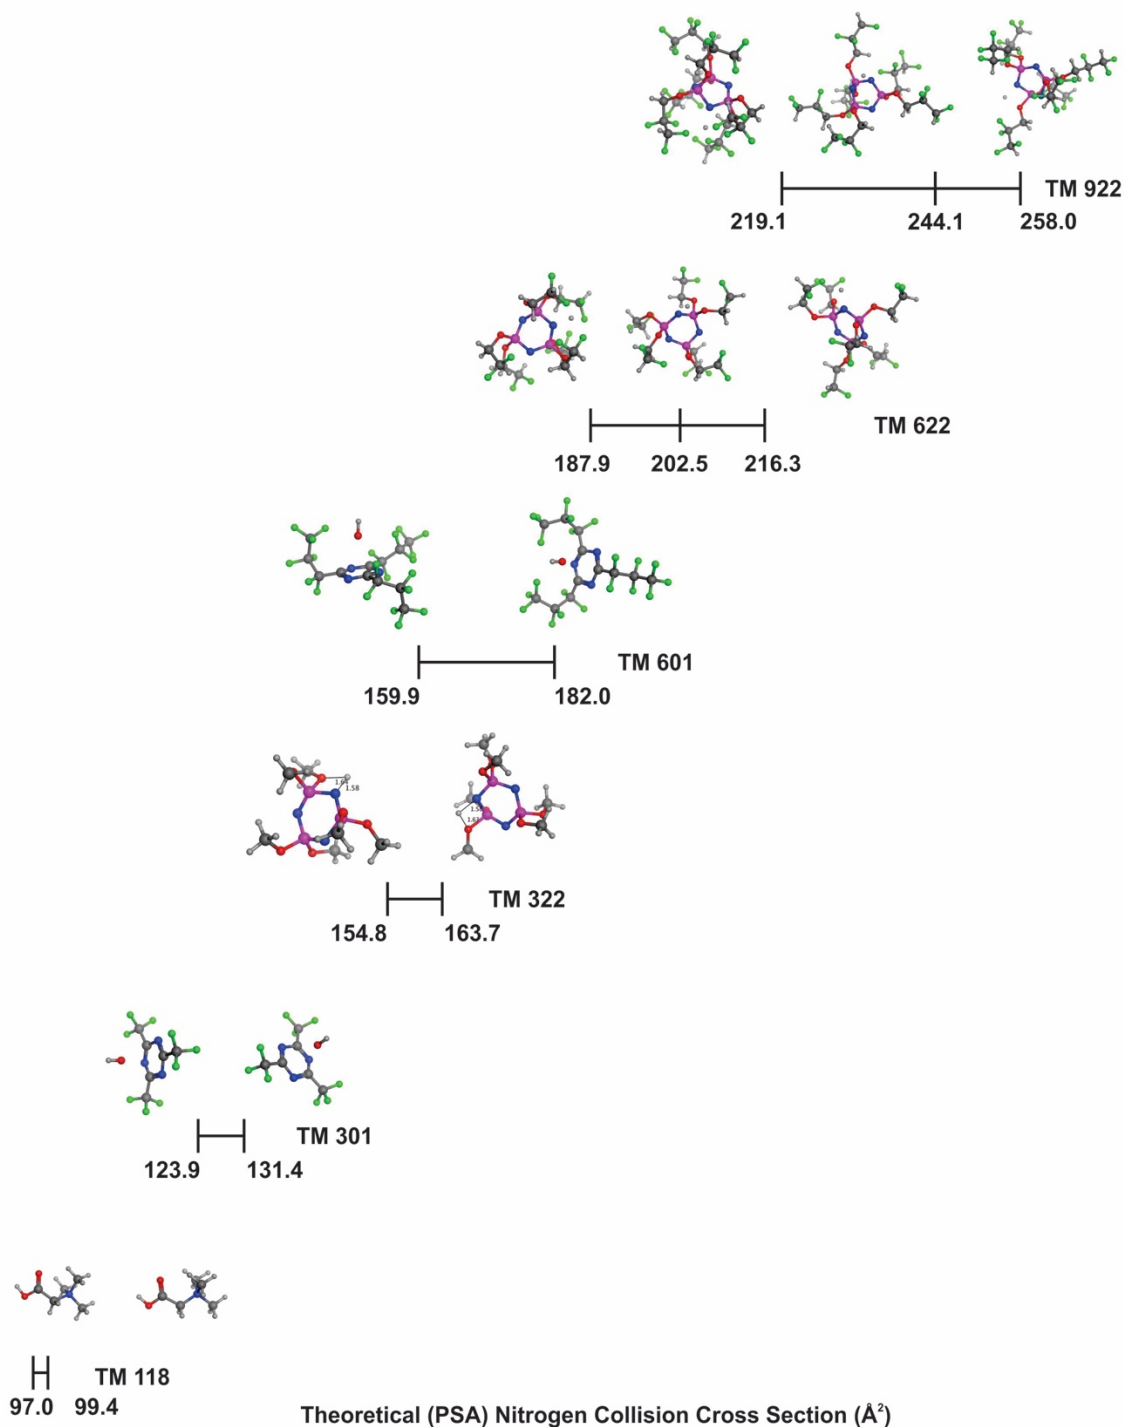

**Figure S7.** Sample conformations from computational sampling for the tune mix ions. A representative conformation is shown for the lowest and highest theoretical CCS values as well as for one that closely agrees with the experimental CCS value. If no conformation is indicated within the range, the experimental CCS value fell outside the range. Carbon is represented with dark grey, hydrogen with light grey, oxygen with red, nitrogen with blue, phosphorus with pink, and fluorine with green.



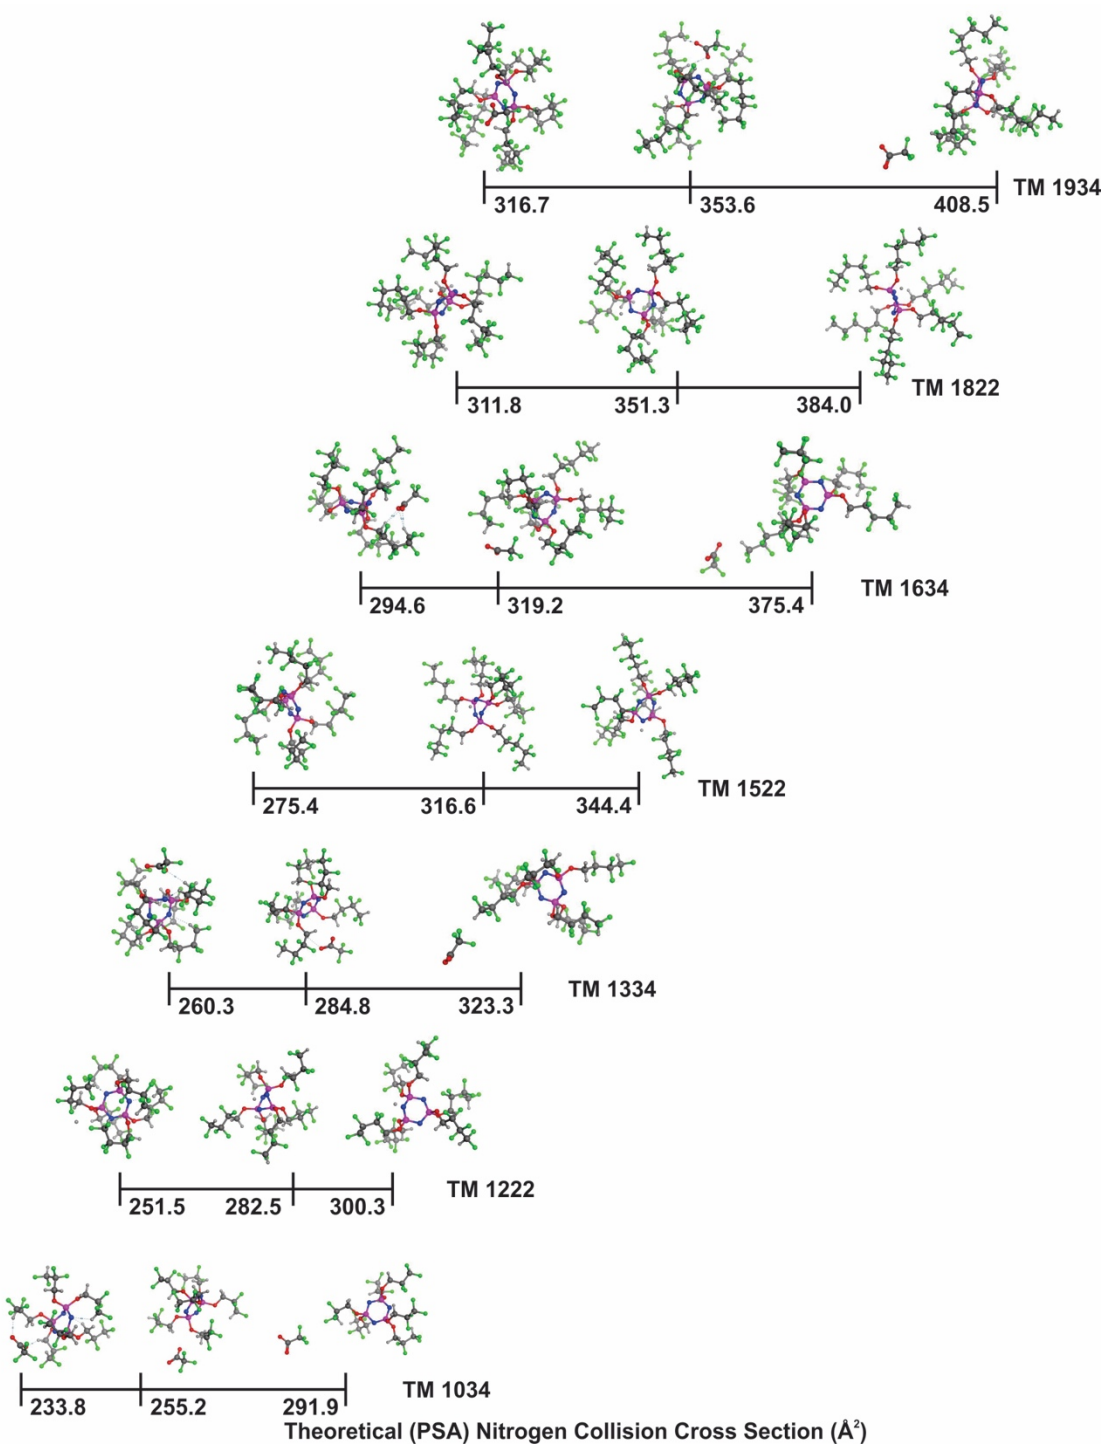

**Figure S8.** Sample conformations from computational sampling for the tune mix ions. A representative conformation is shown for the lowest and highest theoretical CCS values as well as for one that closely agrees with the experimental CCS value. Carbon is represented with dark grey, hydrogen with light grey, oxygen with red, nitrogen with blue, phosphorus with pink, and fluorine with green.

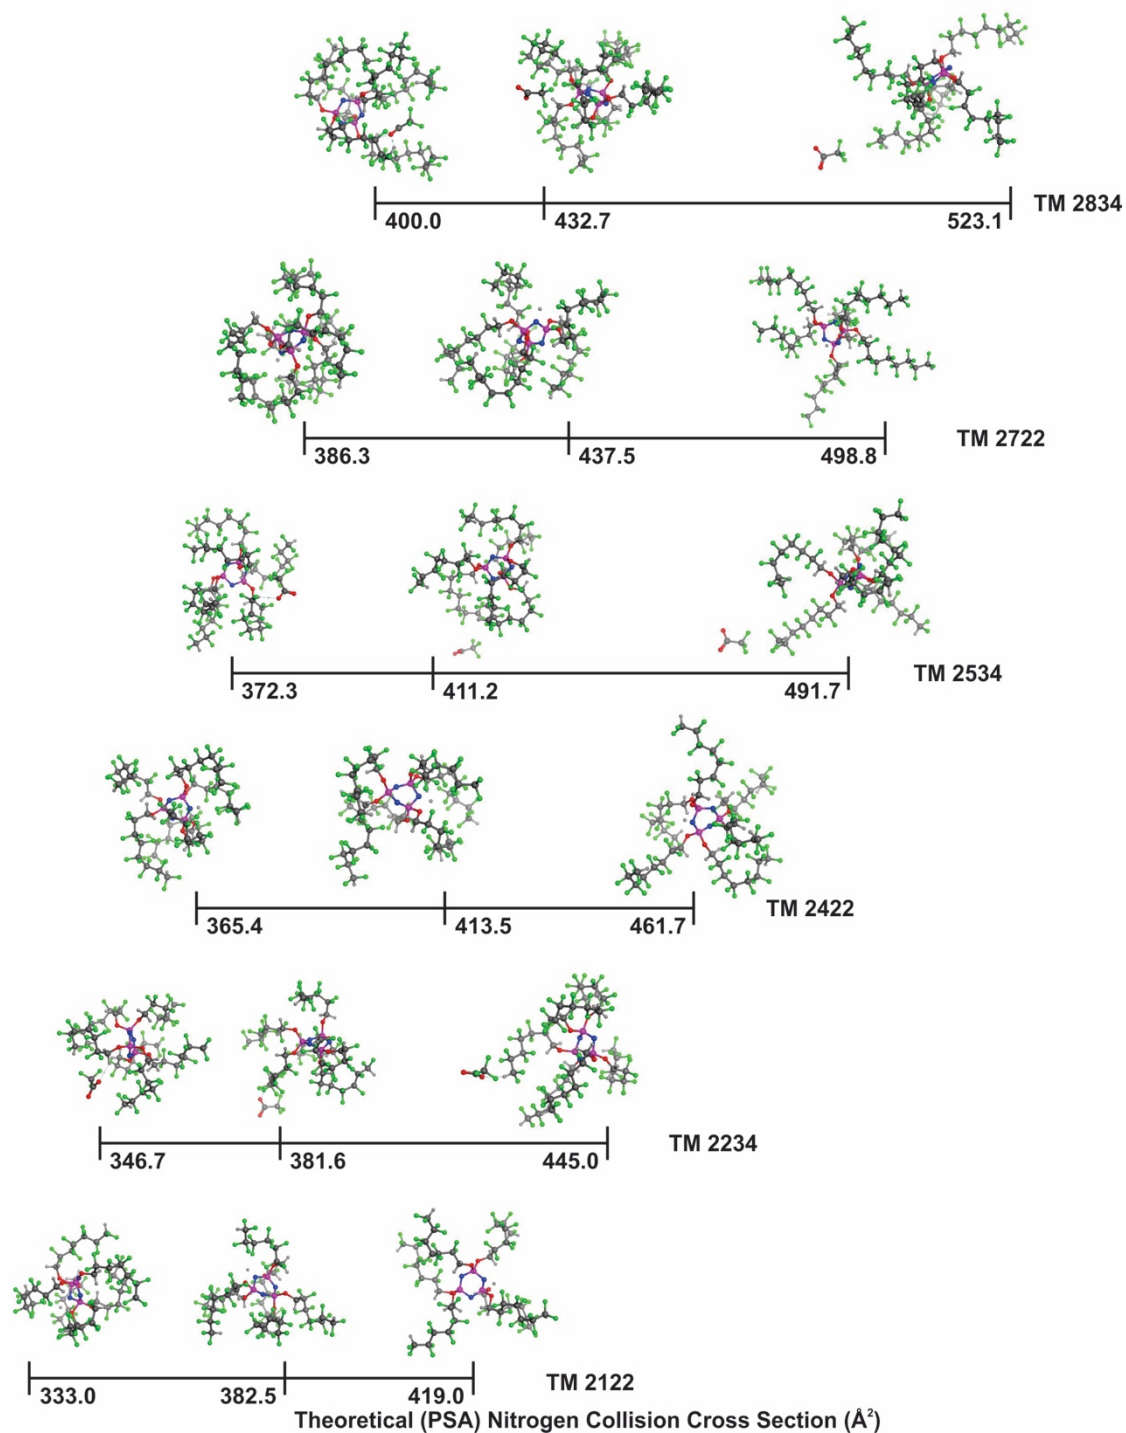

**Figure S9.** Sample conformations from computational sampling for the tune mix ions. A representative conformation is shown for the lowest and highest theoretical CCS values as well as for one that closely agrees with the experimental CCS value. Carbon is represented with dark grey, hydrogen with light grey, oxygen with red, nitrogen with blue, phosphorus with pink, and fluorine with green.

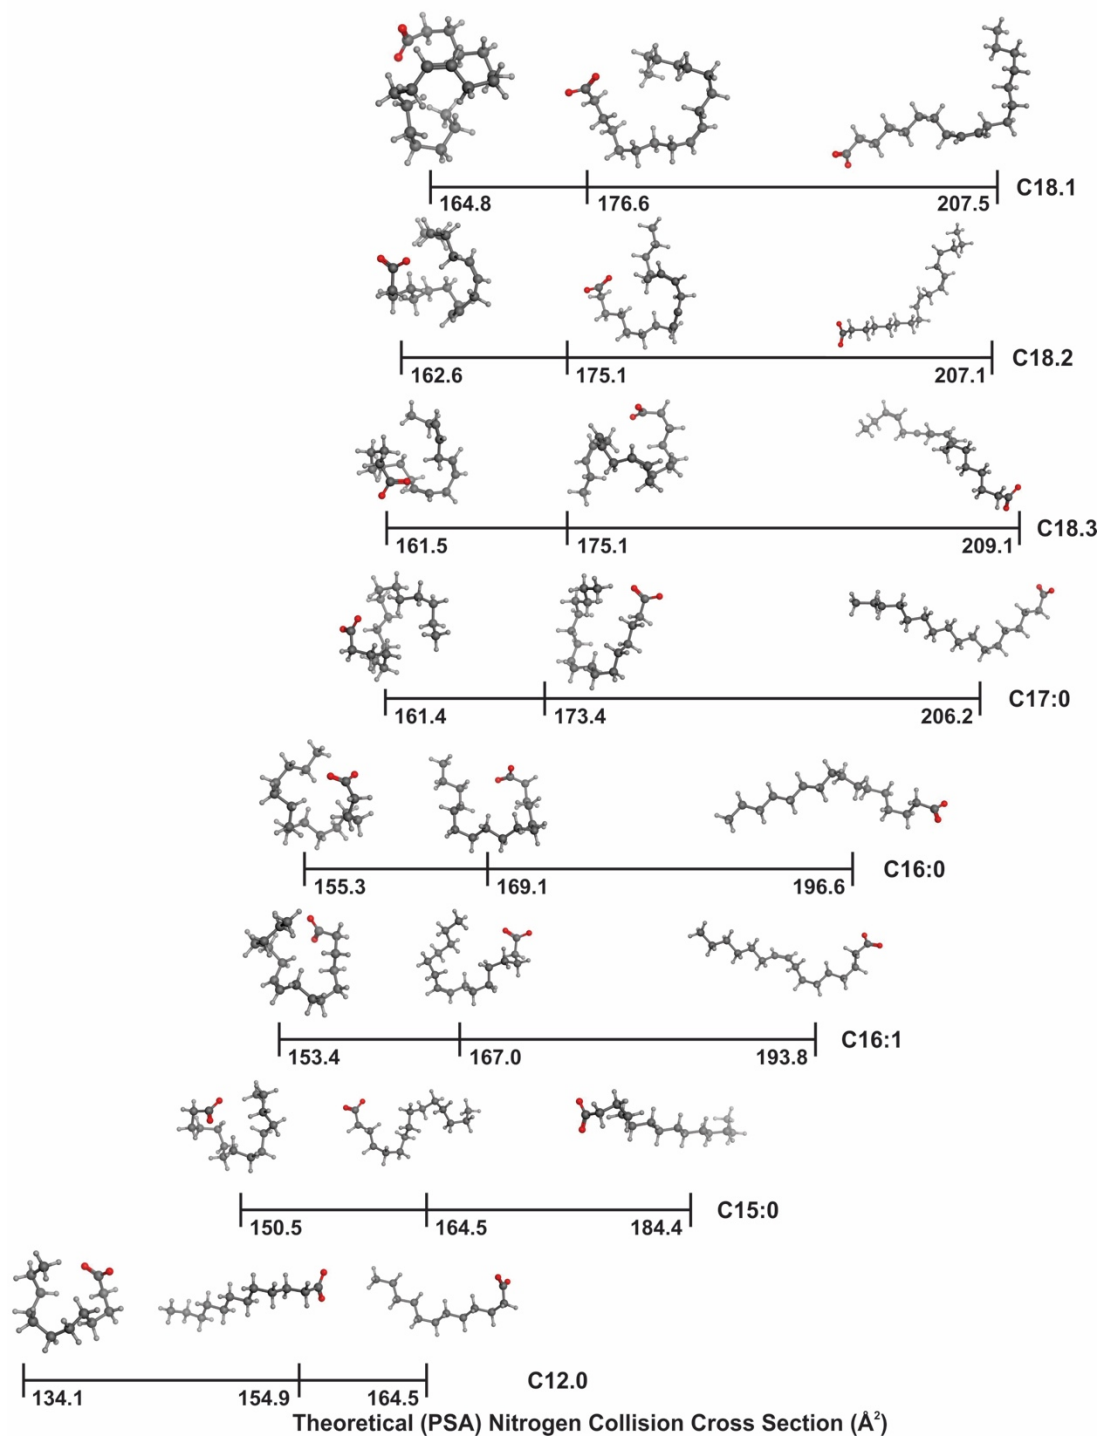

**Figure S10.** Sample conformations from computational sampling for the fatty acids. A representative conformation is shown for the lowest and highest theoretical CCS values as well as for one that closely agrees with the experimental CCS value. Carbon is represented with dark grey, hydrogen with light grey, and oxygen with red.

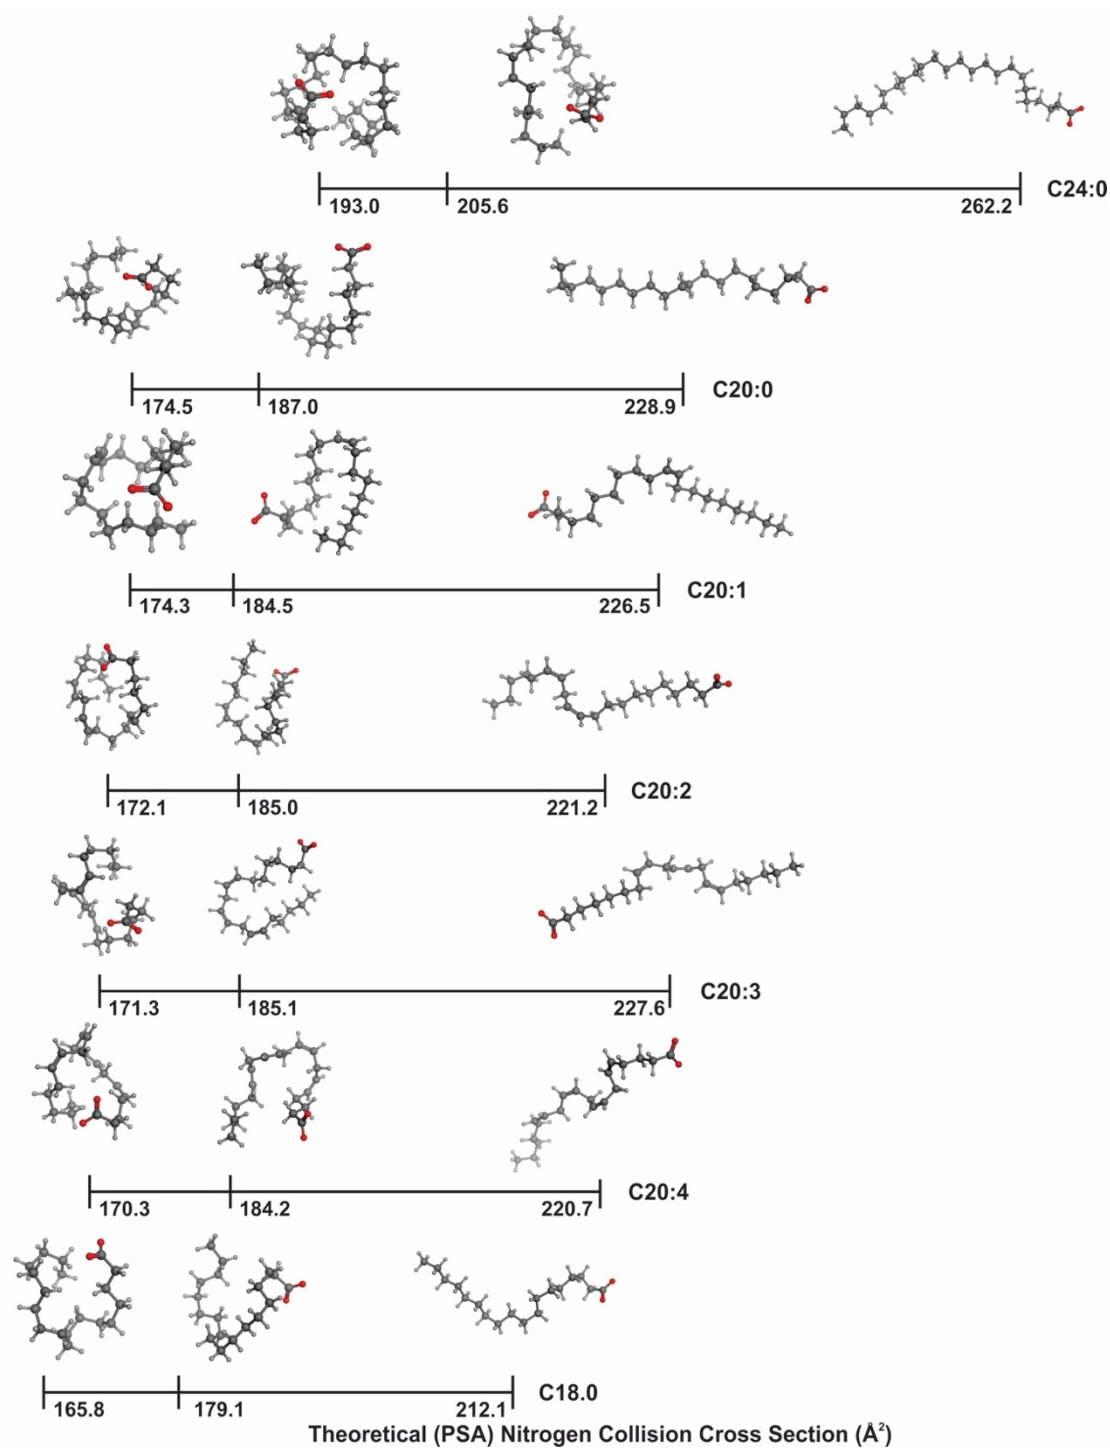

**Figure S11.** Sample conformations from computational sampling for the fatty acids. A representative conformation is shown for the lowest and highest theoretical CCS values as well as for one that closely agrees with the experimental CCS value. Carbon is represented with dark grey, hydrogen with light grey, and oxygen with red.

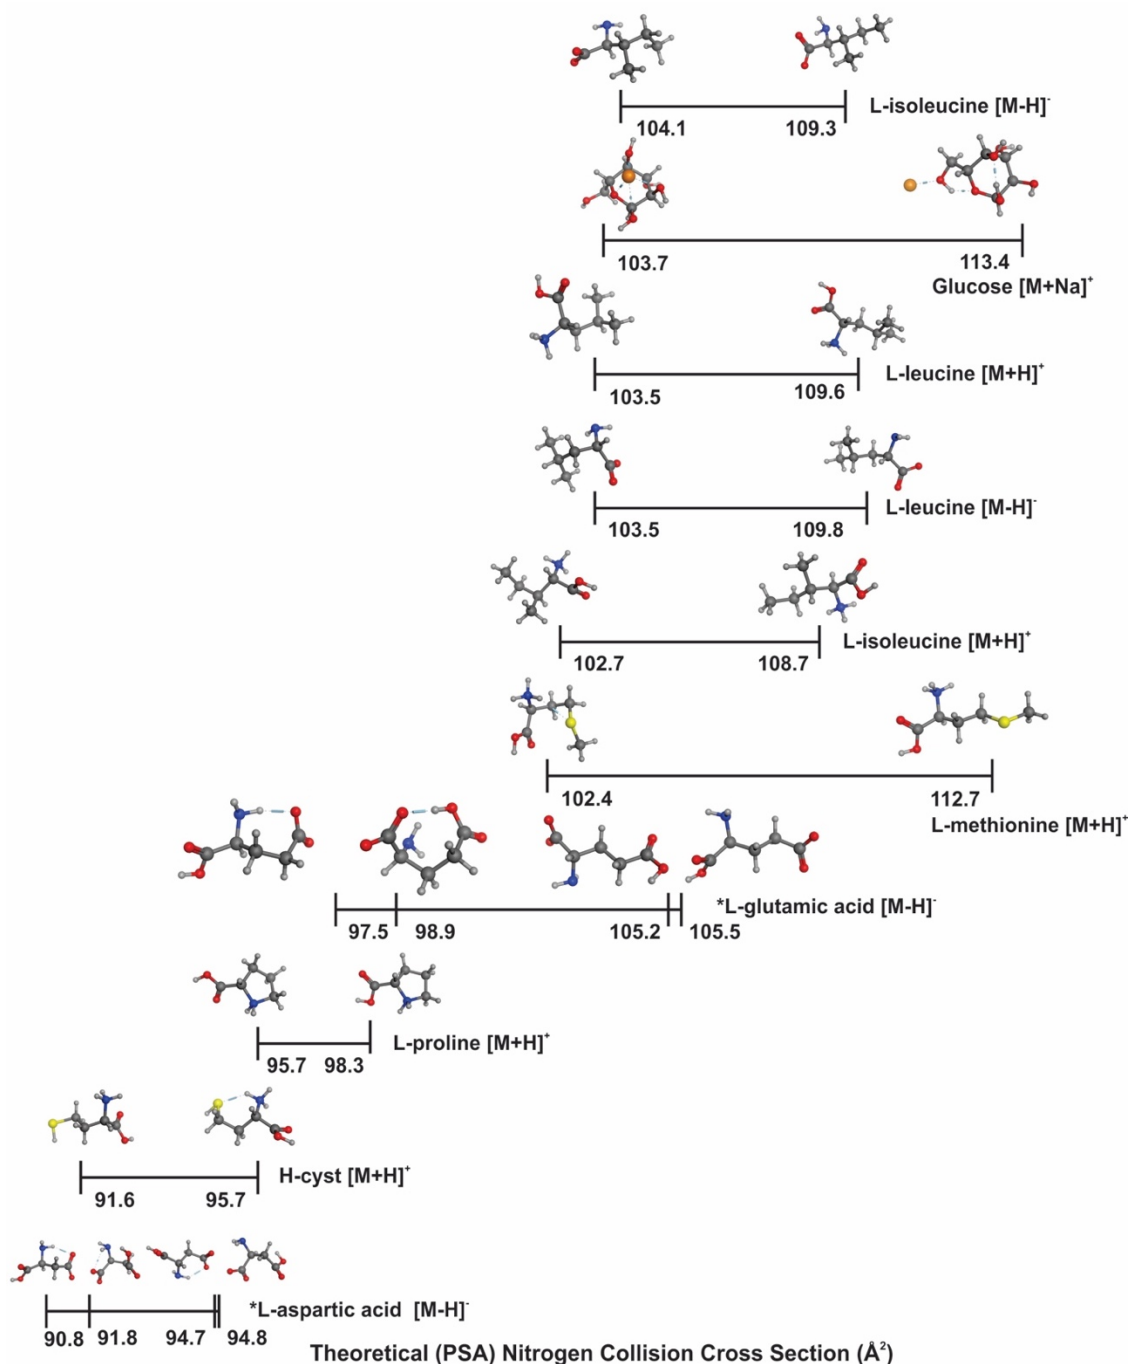

**Figure S12.** Sample conformations from computational sampling for the metabolites. A representative conformation is shown for the lowest and highest theoretical CCS values. If no conformation is indicated within the range, the experimental CCS value fell outside the range. An \* indicates metabolites that had more than one possible protonation sites with conformations shown for the additional protonation site. Carbon is represented with dark grey, hydrogen with light grey, oxygen with red, sulfur with yellow, nitrogen with blue, and sodium with orange.

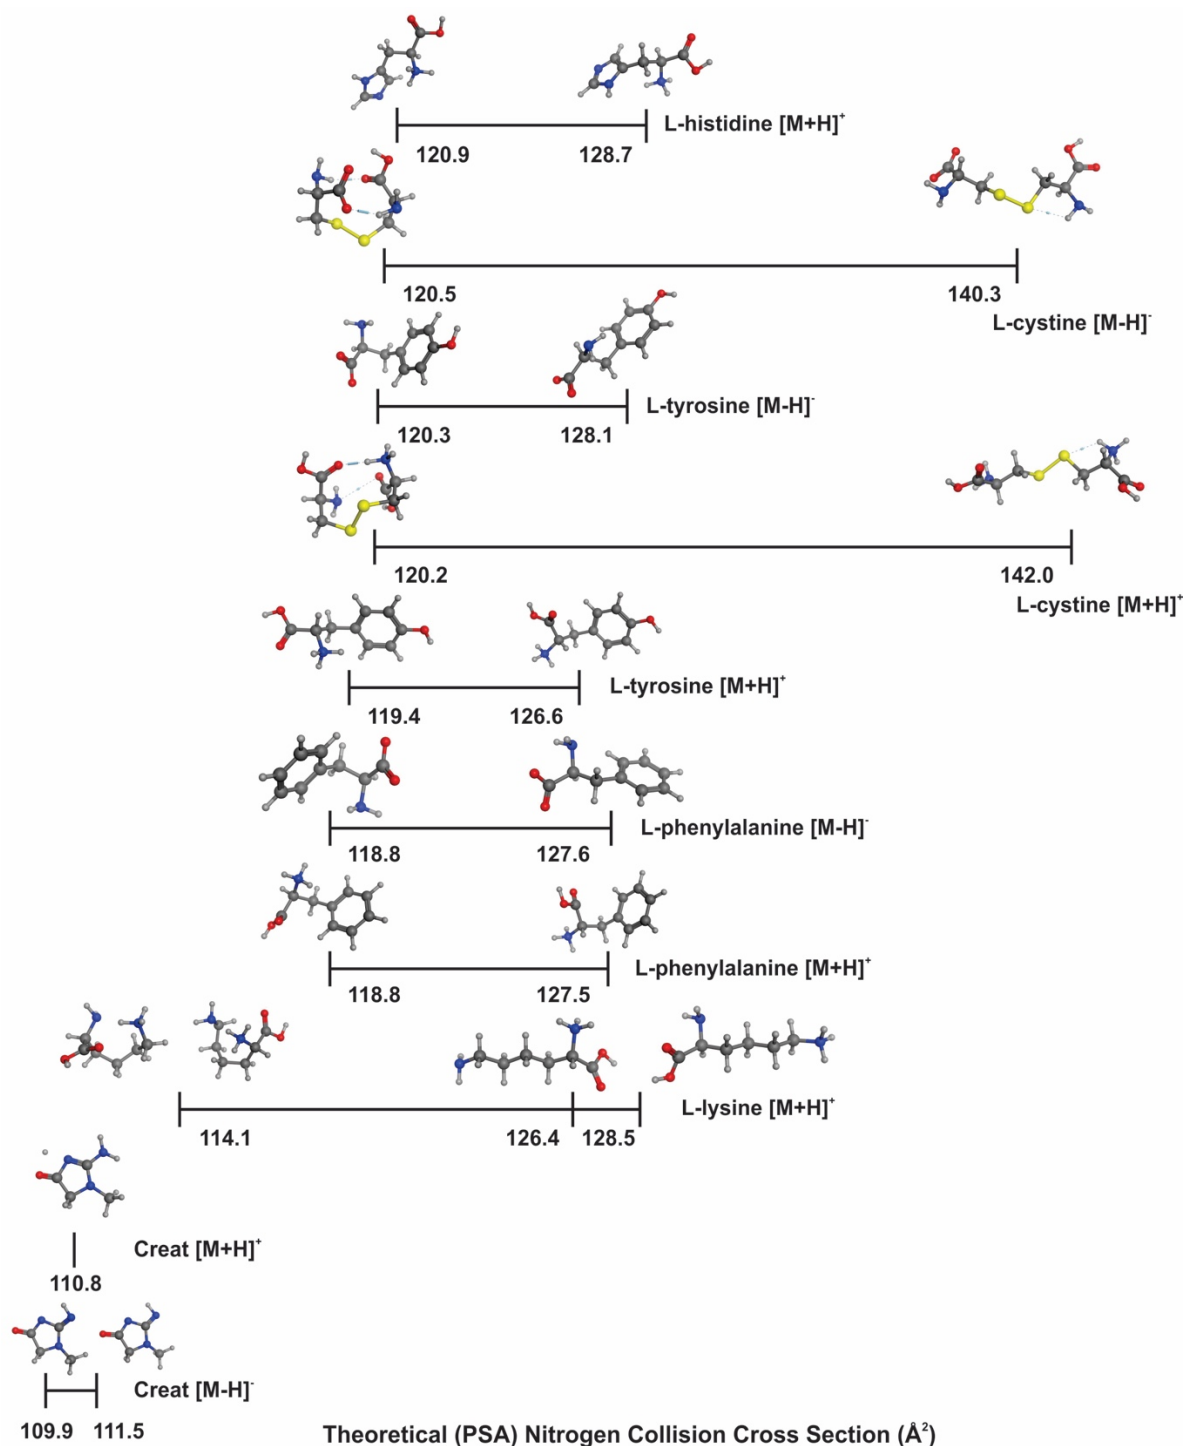

**Figure S13.** Sample conformations from computational sampling for the metabolites. A representative conformation is shown for the lowest and highest theoretical CCS values. If no conformation is indicated within the range, the experimental CCS value fell outside the range. Carbon is represented with dark grey, hydrogen with light grey, oxygen with red, sulfur with yellow, and nitrogen with blue.

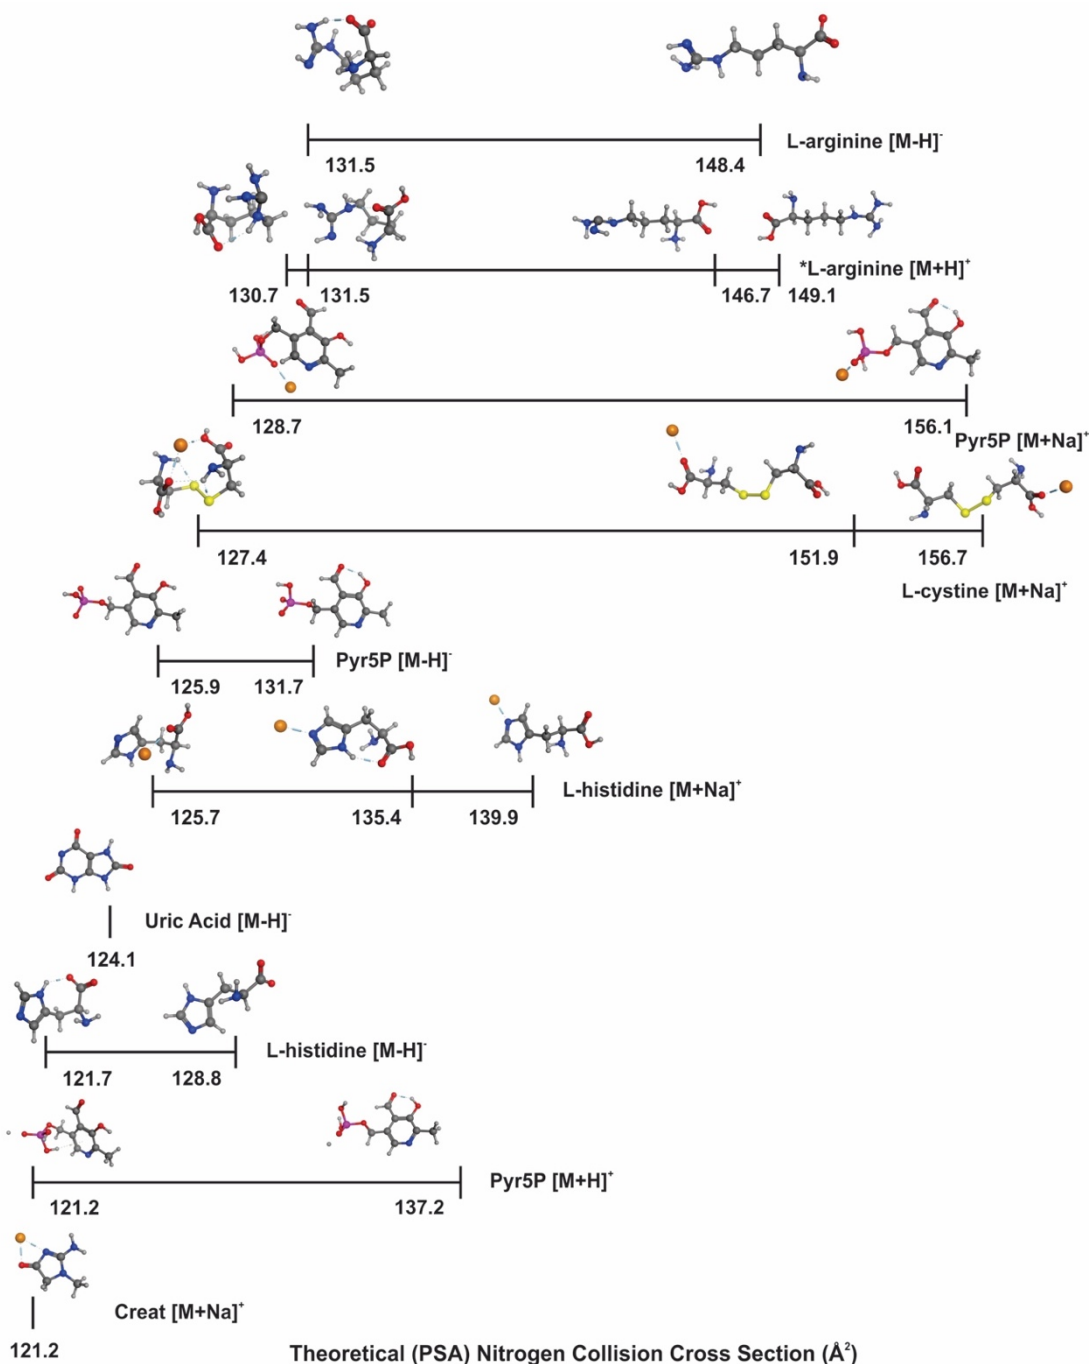

**Figure S14.** Sample conformations from computational sampling for the metabolites. A representative conformation is shown for the lowest and highest theoretical CCS values as well as for one that closely agrees with the experimental CCS value. If no conformation is indicated within the range, the experimental CCS value fell outside the range. An \* indicates metabolites that had more than one possible protonation sites with conformations shown for the additional protonation site. Carbon is represented with dark grey, hydrogen with light grey, oxygen with red, sulfur with yellow, nitrogen with blue, and sodium with orange.

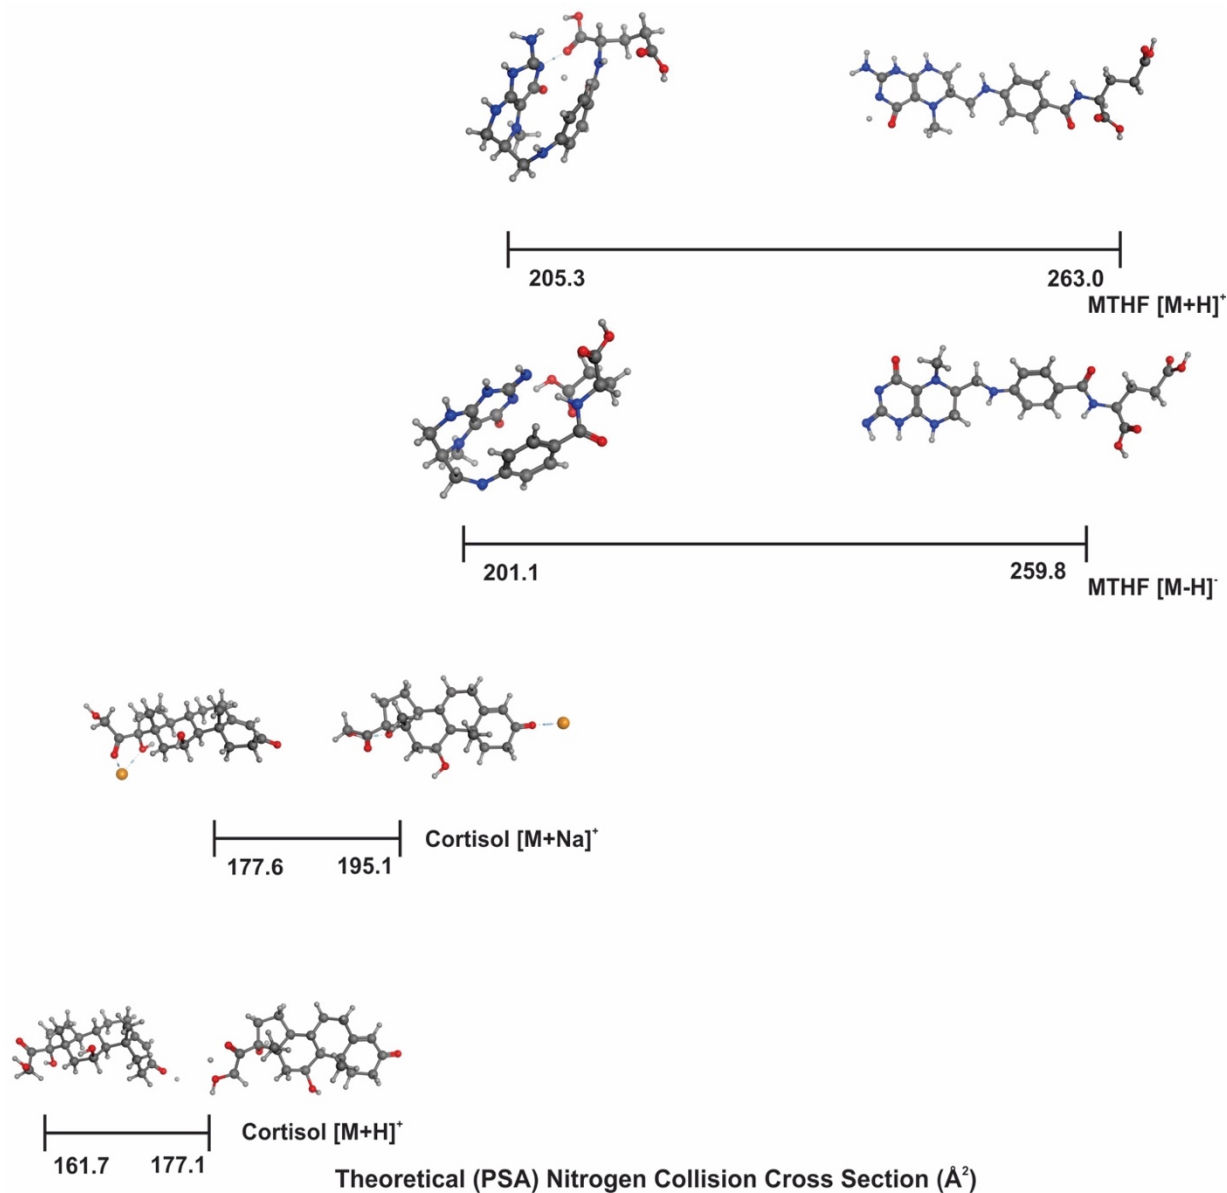

**Figure S15.** Sample conformations from computational sampling for the metabolites. A representative conformation is shown for the lowest and highest theoretical CCS values. If no conformation is indicated within the range, the experimental CCS value fell outside the range. Carbon is represented with dark grey, hydrogen with light grey, oxygen with red, nitrogen with blue, and sodium with orange.



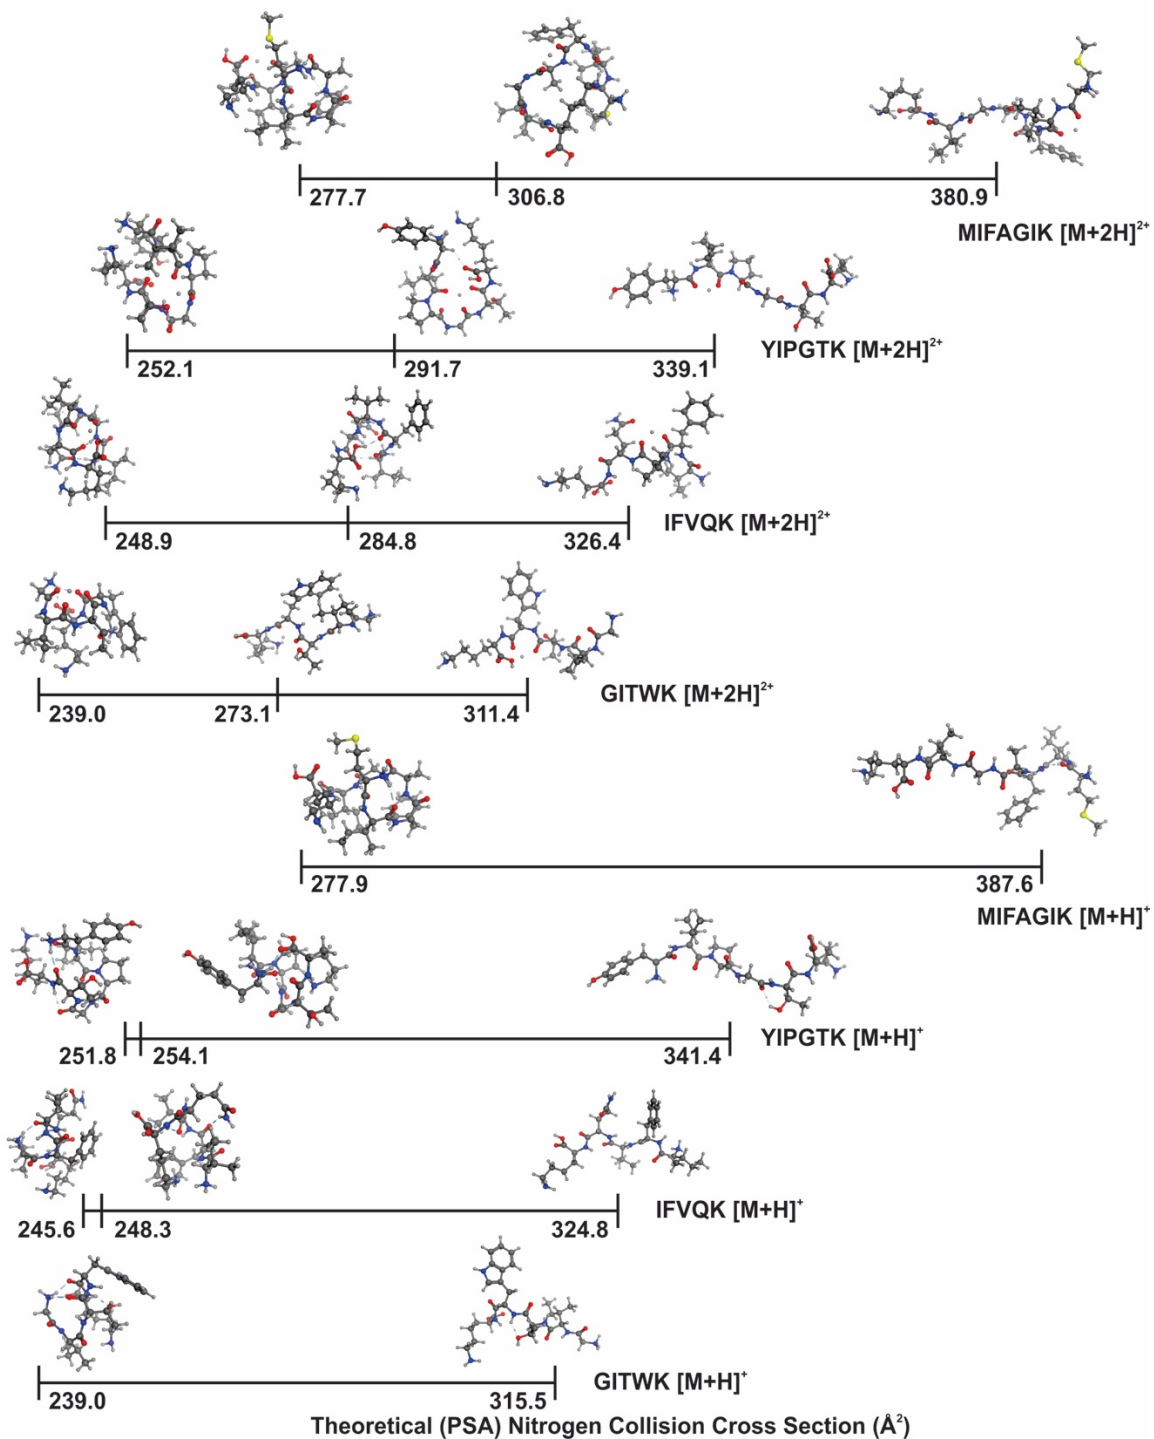

**Figure S16.** Sample conformations from computational sampling for the peptides. A representative conformation is shown for the lowest and highest theoretical CCS values. If no conformation is indicated within the range, the experimental CCS value fell outside the range. Carbon is represented with dark grey, hydrogen with light grey, oxygen with red, nitrogen with blue and sulfur with yellow.

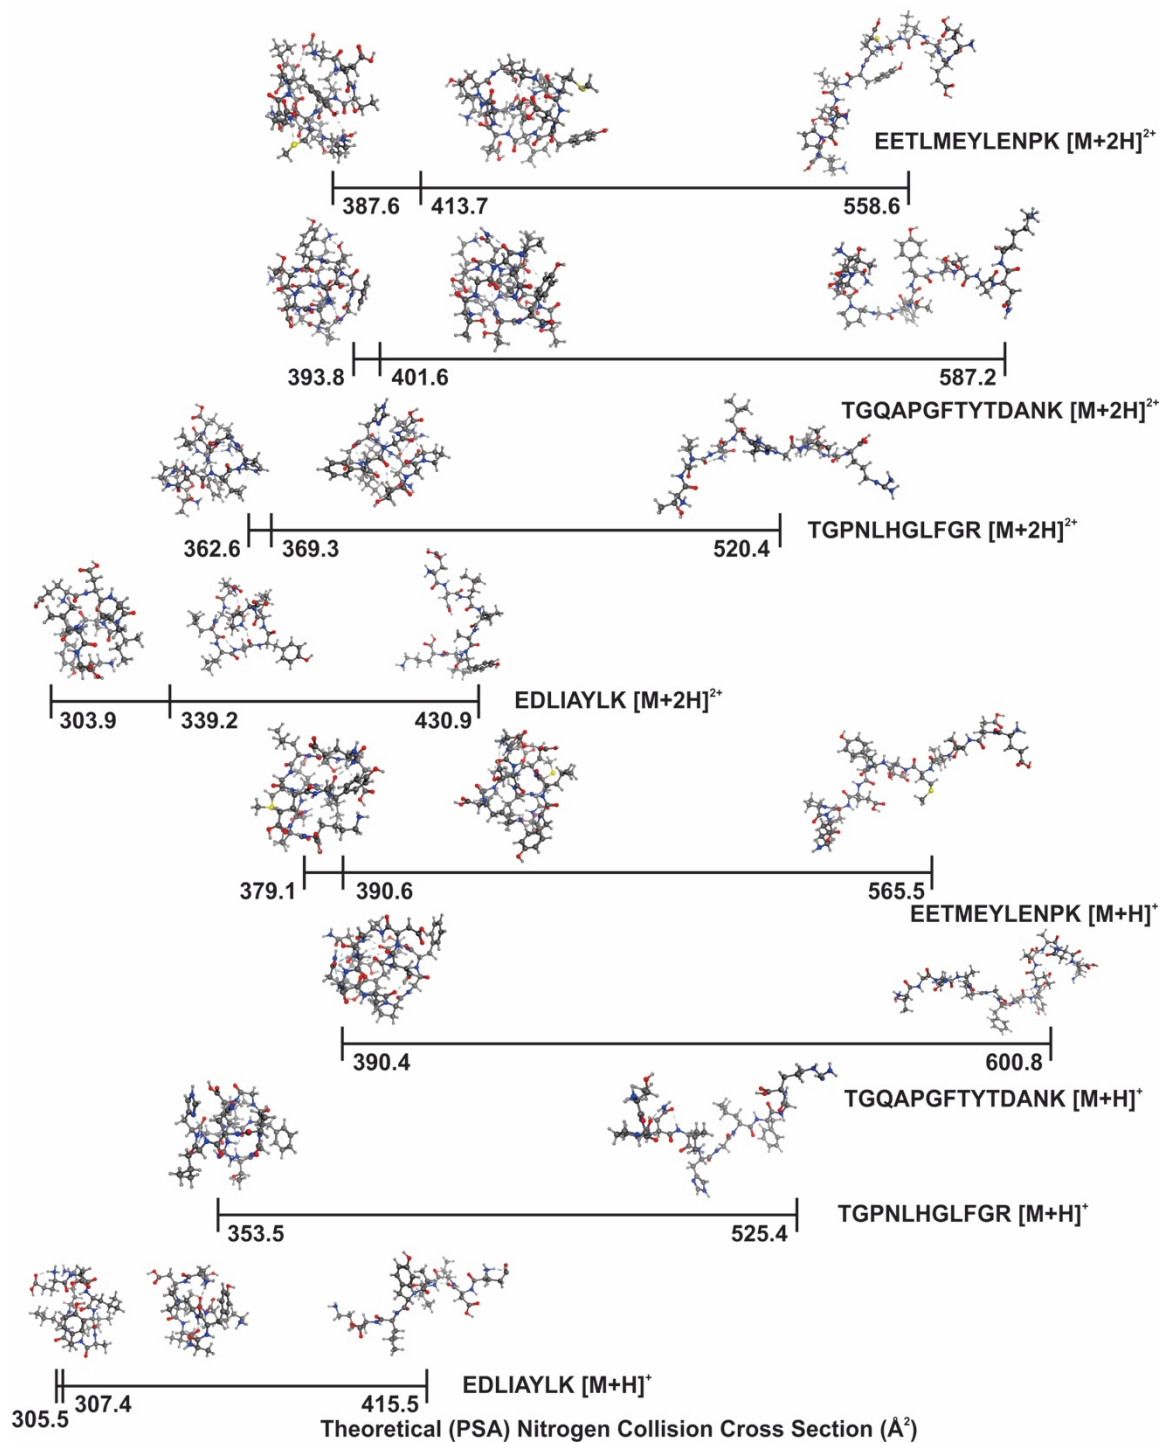

**Figure S17.** Sample conformations from computational sampling for the peptides. A representative conformation is shown for the lowest and highest theoretical CCS values. If no conformation is indicated within the range, the experimental CCS value fell outside the range. Carbon is represented with dark grey, hydrogen with light grey, oxygen with red, nitrogen with blue, and sulfur with yellow.

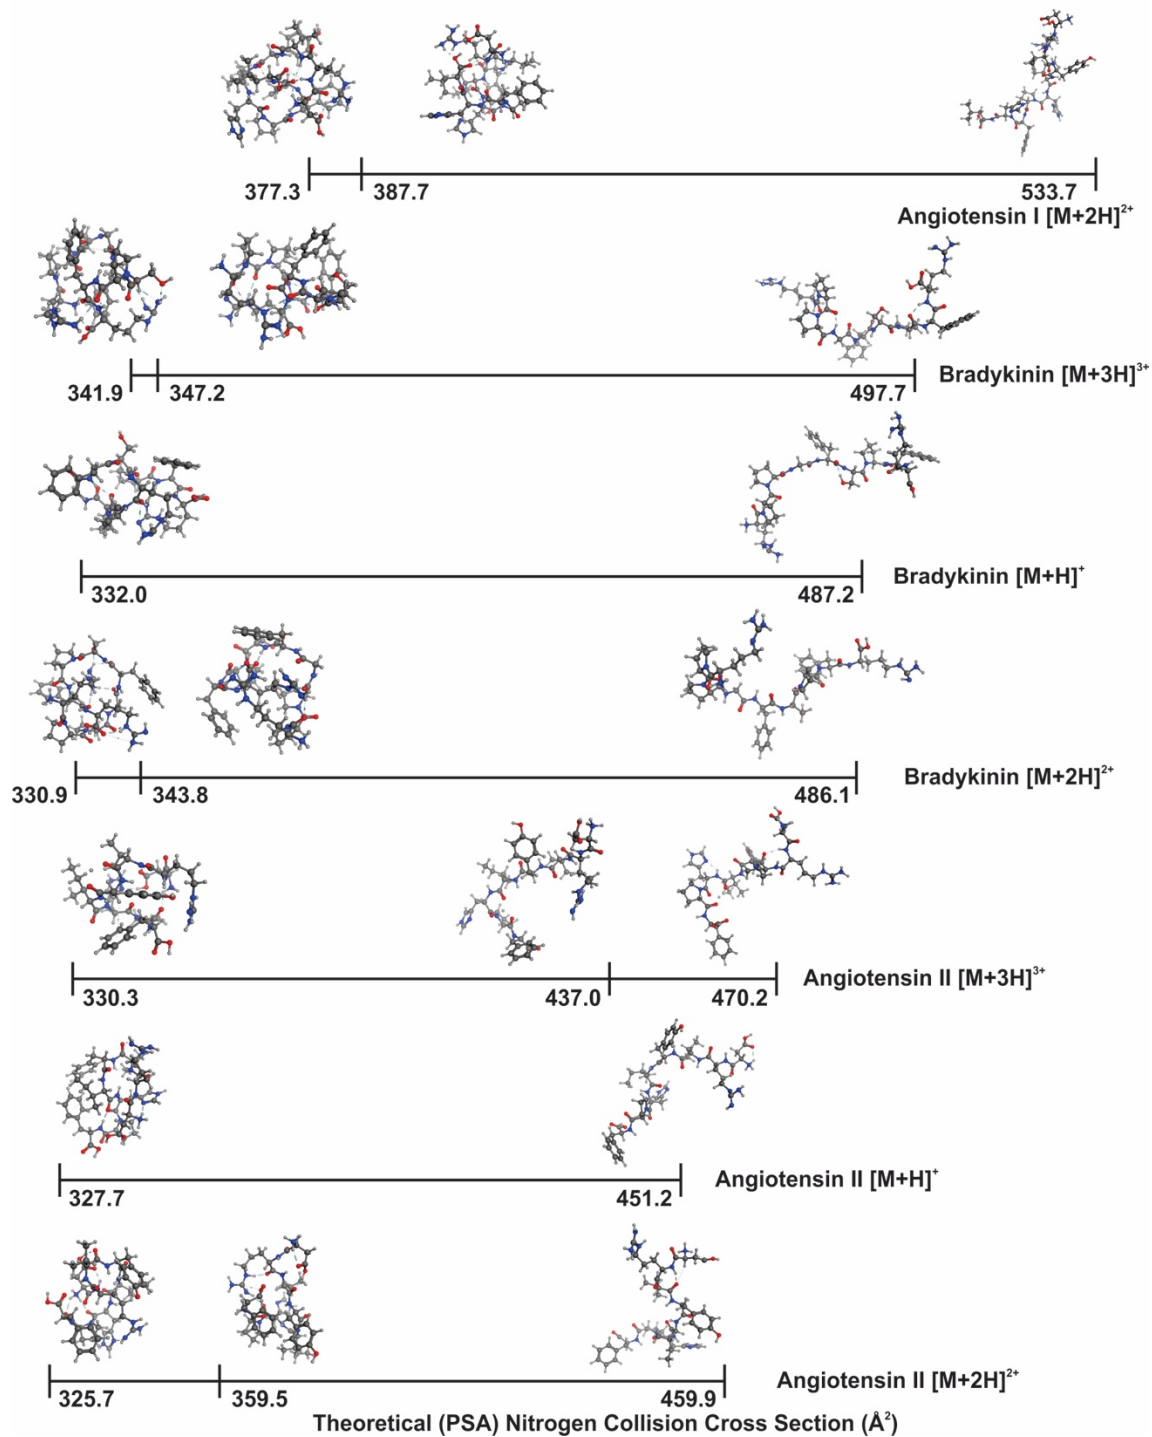

**Figure S18.** Sample conformations from computational sampling for the peptides. A representative conformation is shown for the lowest and highest theoretical CCS values. If no conformation is indicated within the range, the experimental CCS value fell outside the range. Carbon is represented with dark grey, hydrogen with light grey, oxygen with red, nitrogen with blue, and sulfur with yellow.

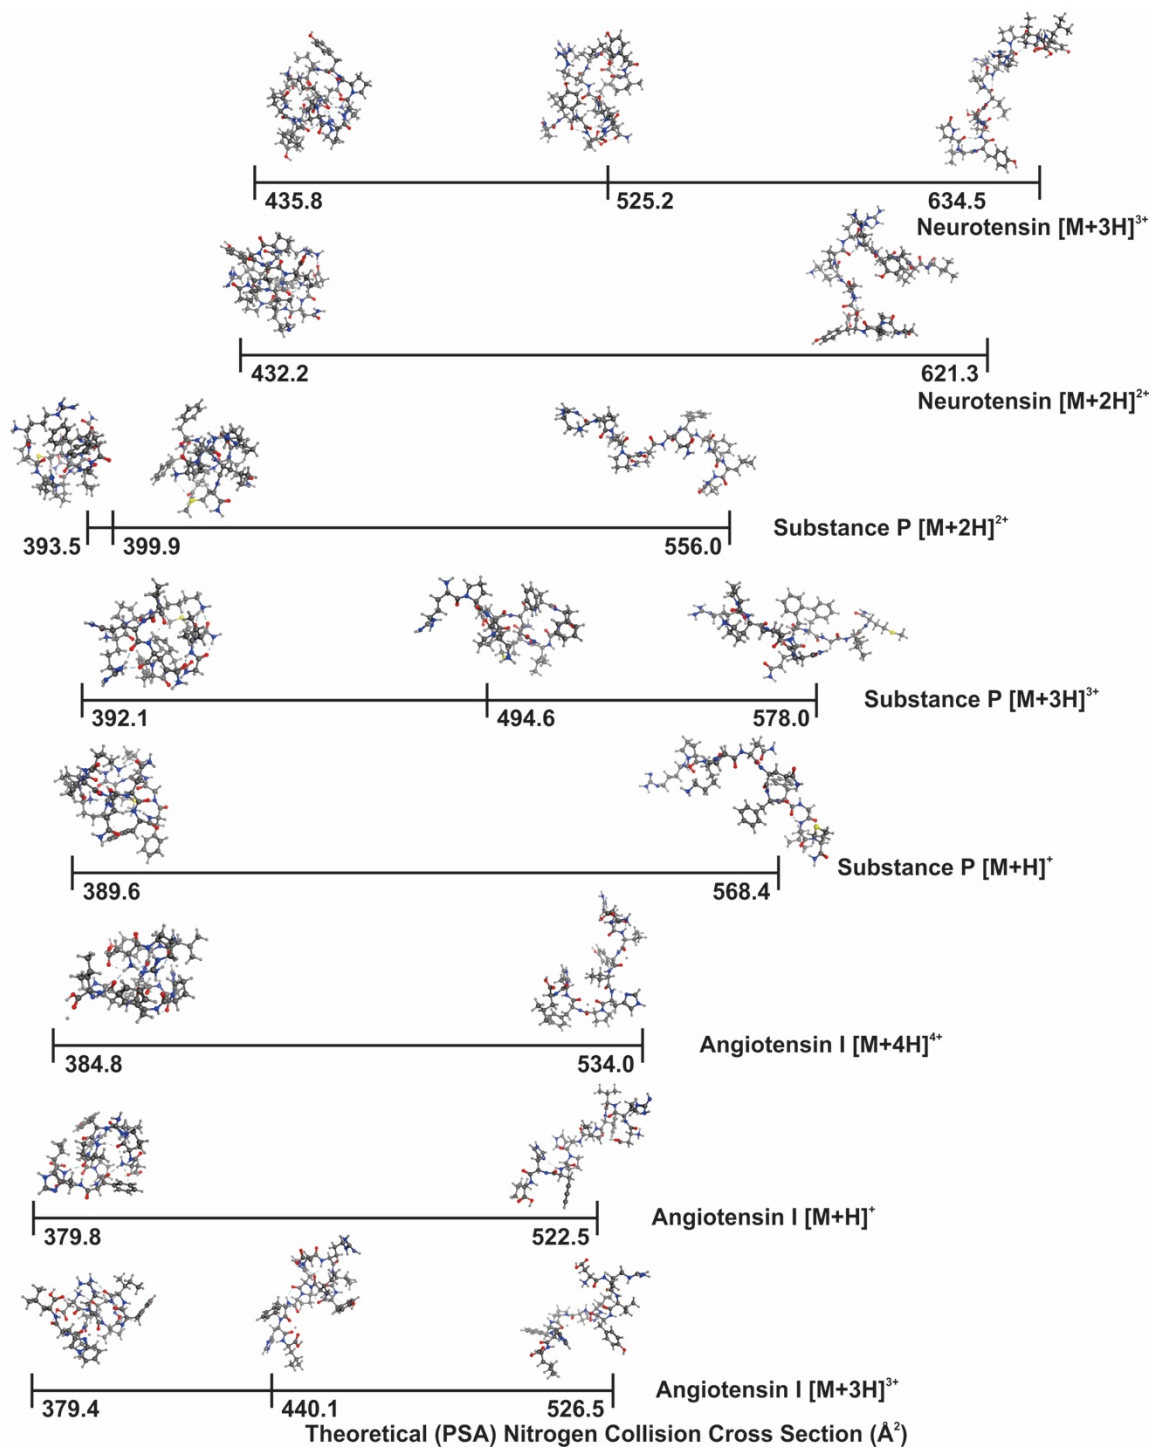

**Figure S19.** Sample conformations from computational sampling for the peptides. A representative conformation is shown for the lowest and highest theoretical CCS values. If no conformation is indicated within the range, the experimental CCS value fell outside the range. Carbon is represented with dark grey, hydrogen with light grey, oxygen with red, nitrogen with blue, and sulfur with yellow.

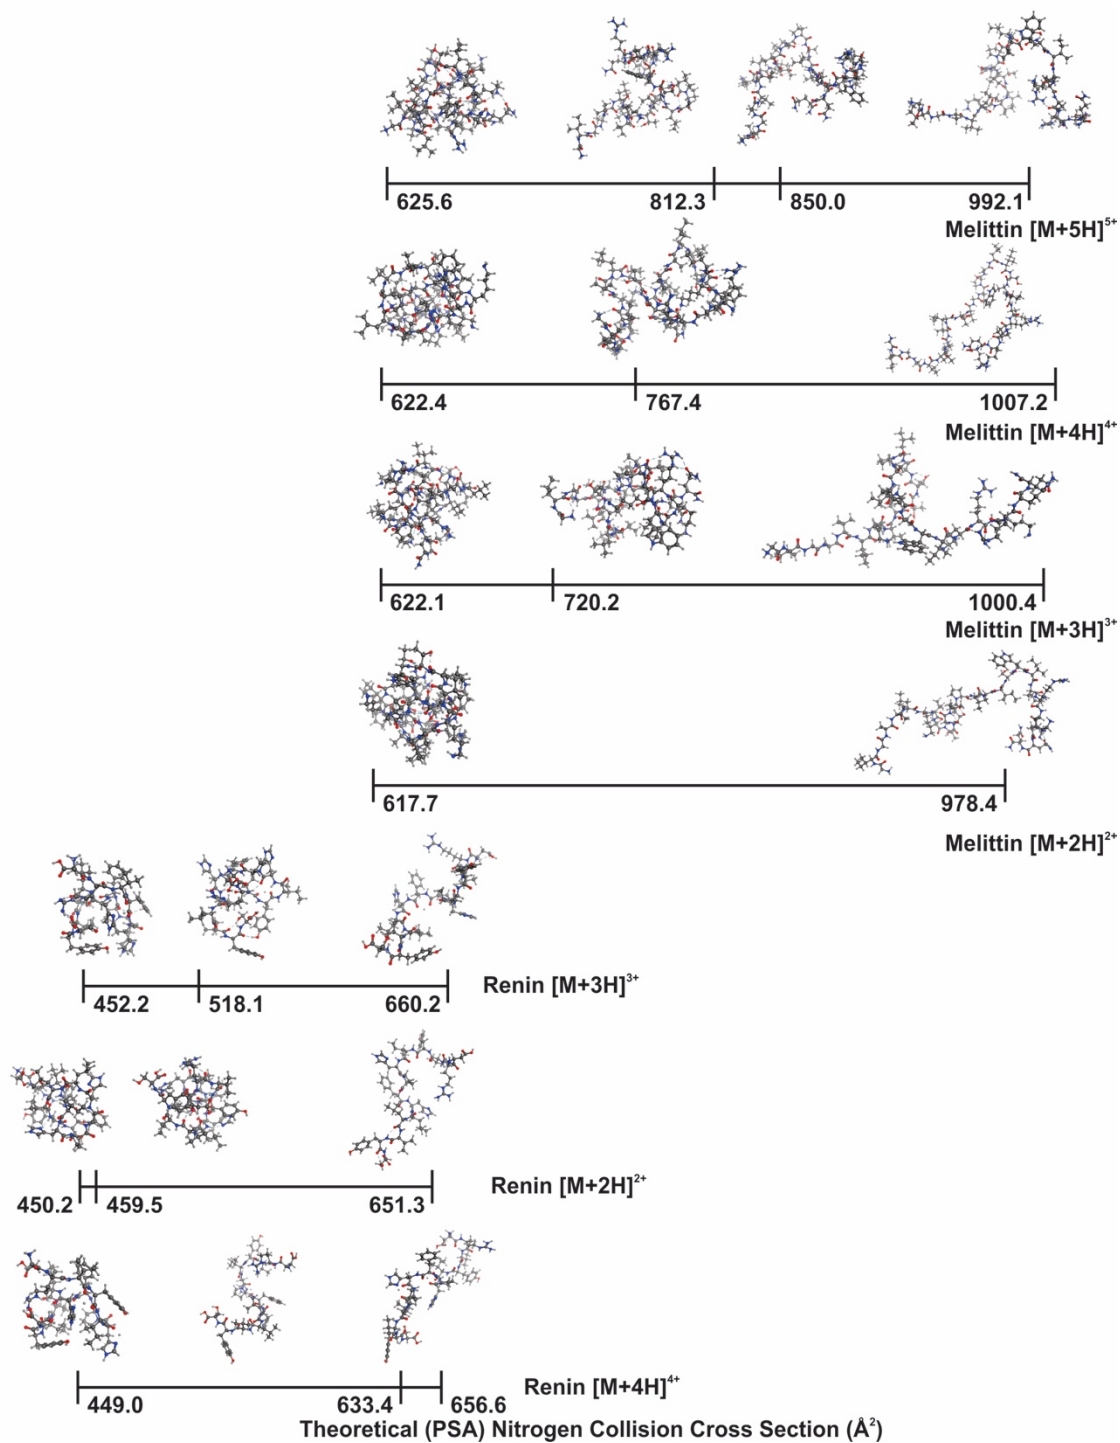

**Figure S20.** Sample conformations from computational sampling for the peptides. A representative conformation is shown for the lowest and highest theoretical CCS values. If no conformation is indicated within the range, the experimental CCS value fell outside the range. Carbon is represented with dark grey, hydrogen with light grey, oxygen with red, nitrogen with blue, and sulfur with yellow.

## References:

- (1) Frisch, M. J.; Trucks, G. W.; Schlegel, H. B.; Scuseria, G. E.; Robb, M. A.; Cheeseman, J. R.; Scalmani, G.; Barone, V.; Mennucci, B.; Petersson, G. A., Gaussian 09 software. *Gaussian Inc., Wallingford* **2009**.
- (2) *Molecular Operating Environment (MOE)*, 2012.10; Chemical Computing Group Inc.: 1010 Sherbooke St. West, Suite #910, Montreal, QC, Canada, H3A 2R7, 2012.
- (3) Case, D. A.; Babin, V.; Berryman, J.; Betz, R. M.; Cai, Q.; Cerutti, D. S.; Cheatham Iii, T. E.; Darden, T. A.; Duke, R. E.; Gohlke, H., Amber 14. **2014**.
- (4) Stow, S. M.; Goodwin, C. R.; Kliman, M.; Bachmann, B. O.; McLean, J. A.; Lybrand, T. P., *J Phys. Chem. B* **2014**, *118* (48), 13812-13820.
- (5) Mesleh, M. F.; Hunter, J. M.; Shvartsburg, A. A.; Schatz, G. C.; Jarrold, M. F., *J. Phys. Chem.* **1996**, *100*, 16082-16086.
- (6) Bleiholder, C.; Wyttenbach, T.; Bowers, M. T., *Int. J. of Mass Spectrom.* **2011**, *308*, 1-10.
- (7) Bleiholder, C.; Contreras, S.; Do, T. D.; Bowers, M. T., *Int. J. of Mass Spectrom.* **2013**, *345*, 89-96.
- (8) Anderson, S. E.; Bleiholder, C.; Brocker, E. R.; Stang, P. J.; Bowers, M. T., *Int. J. Mass Spectrom.* **2012**, *330-332*, 78-84.
- (9) Bleiholder, C.; Contreras, S.; Bowers, M. T., *Int. J. Mass Spectrom.* **2013**, *354*, 275-280.
- (10) Illenseer, C.; Löhmannsröben, H.-G., *Phys. Chem. Chem. Phys.* **2001**, *3*, 2388-2393.
